# Supplementary material for: Assessment of reagents for selenocysteine conjugation and the stability of selenocysteine adducts
Source: Royal Society of Chemistry journal article supplement (doi:10.1039/c6ob00775a), 2016-01-01
Supplement: c6ob00775a1.pdf [file c6ob00775a1.pdf]

## *Supporting Information*

### **A Survey of Reagents for Selenocysteine Conjugation and the Stability of Resulting Selenocysteine Adducts**

Lee Pedzisa<sup>§</sup>, Xiuling Li<sup>†</sup>, Christoph Rader<sup>†,|||</sup>, William R. Roush<sup>§,\*</sup>

<sup>§</sup>Department of Chemistry, <sup>†</sup>Department of Cancer Biology, and <sup>|||</sup>Department of Molecular Therapeutics, The  
Scripps Research Institute, Scripps Florida, Jupiter, FL 33458, United States

## Table of Contents

|                                                                            |            |
|----------------------------------------------------------------------------|------------|
| <b>1. General Information</b> .....                                        | <b>S3</b>  |
| <b>2. Physical Properties and Spectroscopic Measurements</b> .....         | <b>S3</b>  |
| <b>3. Experimental Section</b> .....                                       | <b>S3</b>  |
| 3.1. Selenocystine Synthesis .....                                         | <b>S3</b>  |
| 3.2. Selenocysteine Conjugation .....                                      | <b>S5</b>  |
| 3.3. Figures and Schemes .....                                             | <b>S10</b> |
| 3.4. Antibody Conjugation and Analysis .....                               | <b>S10</b> |
| <b>4. NMR Spectra</b> .....                                                | <b>S13</b> |
| <b>5. LC-MS Spectra for Selenocysteine Adducts Stability Studies</b> ..... | <b>S22</b> |
| 5.1. Stability experiments at pH 5.2 NaOAc buffer .....                    | <b>S22</b> |
| 5.2. Stability experiments under basic conditions .....                    | <b>S25</b> |
| 5.3. Stability experiments under oxidizing conditions .....                | <b>S28</b> |
| 5.4. Stability study in the presence of glutathione .....                  | <b>S31</b> |
| 5.5. Stability study in human blood plasma .....                           | <b>S35</b> |
| <b>6. References</b> .....                                                 | <b>S40</b> |

## 1. General Information:

Dimethylformamide and dichloromethane were purified by passing through a solvent column of activated alumina (A-1). Unless otherwise indicated, all starting materials were purchased from different commercial sources and were used without further purification. Triethylamine was distilled before use. Reactions were conducted under an atmosphere of argon using flamed-dried glassware. Standard techniques for handling air-sensitive compounds were employed for all the operations. Removal of solvents was accomplished on a rotary evaporator at reduced pressure.

## 2. Physical Properties and Spectroscopic Measurements:

$^1\text{H}$  NMR spectra were recorded on a Bruker spectrometer at 400 MHz.  $^{13}\text{C}$  NMR spectra were recorded on a Bruker spectrometer at 100 MHz. The proton signal for non-deuterated solvent ( $\delta$  7.26 for  $\text{CHCl}_3$ ) was used as an internal reference for  $^1\text{H}$  NMR spectra. For  $^{13}\text{C}$  NMR spectra, chemical shifts are reported relative to the  $\delta$  77.0 resonance of  $\text{CHCl}_3$ . Infrared (IR) spectra were recorded on neat samples using a Perkin-Elmer Spectrum One FT-IR Spectrometer equipped with a Universal ATR Sampling Accessory. High-resolution mass spectra were recorded at the University of Illinois Mass Spectrometry Laboratory. Analytical thin layer chromatography (TLC) was performed on Kieselgel 60 F254 glass plates precoated with a 0.25-mm thickness of silica gel. TLC plates were visualized with UV light and/or by staining with potassium permanganate (1.5g  $\text{KMnO}_4$ , 10 g  $\text{K}_2\text{CO}_3$ , 1.25 10%  $\text{NaOH}$  in 200 mL  $\text{H}_2\text{O}$ ). Column chromatography was generally performed using a Biotage Isolera<sup>TM</sup> purification system with Biotage pre-packed columns. LC-MS was performed on an Agilent Infinity LC with an Agilent Technologies 500 MS.

## 3. Experimental Section

### 3.1. Selenocystine Synthesis

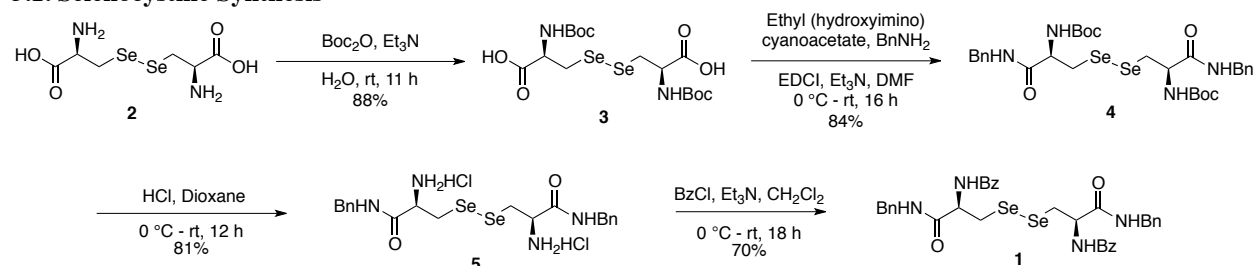

**(2R,2'R)-3,3'-diselanediyldis(2-((tert-butoxycarbonyl)amino)propanoic acid) (3):** To a suspension of L-selenocystine (500 mg, 1.50 mmol, 1 equiv) in water (7.5 mL) was added  $\text{Et}_3\text{N}$  (0.63 mL, 4.49 mmol, 3 equiv) and

the resulting in a brown solution was placed in an ice bath. Di-*tert*-butyl-dicarbonate (980 mg, 4.49 mmol, 3 equiv) was added in small portions with vigorous stirring (over 5 minutes). The suspension was stirred at rt for 11 h, diluted with EtOAc (20 mL), washed with 1N HCl (20 mL), extracted with EtOAc (2 x 20 mL), washed with brine (20 mL), dried (MgSO<sub>4</sub> and Na<sub>2</sub>SO<sub>4</sub>), filtered, and concentrated under reduced pressure to give title compound (700 mg, 88%) as a yellow foam that was used in the next step without further purification. <sup>1</sup>H NMR (400 MHz, Methanol-*d*<sub>4</sub>): δ 4.40 (dd, *J* = 8.8, 4.7 Hz, 2H), 3.45 (dd, *J* = 12.6, 4.9 Hz, 2H), 3.20 (dd, *J* = 12.7, 9.0 Hz, 2H), 1.45 (s, 18H). <sup>13</sup>C NMR (101 MHz, MeOD) δ 174.38, 157.82, 80.74, 55.65, 32.51, 28.77; IR (neat) 3380, 2981, 1683, 1512, 1286, 1243, 1162, 1050 cm<sup>-1</sup>; HRMS (ESI) calcd for C<sub>16</sub>H<sub>28</sub>N<sub>2</sub>O<sub>8</sub>Se<sub>2</sub>Na (M+Na)<sup>+</sup> 559.0074, found 559.0068

**Di-*tert*-butyl ((2*R*,2'*R*)-diselanediybis(1-(benzylamino)-1-oxopropane-3,2-diyl)dicarbamate (4):** To (2*R*,2'*R*)-3,3'-diselanediybis(2-((*tert*-butoxycarbonyl)amino)propanoic acid) (**3**, 980 mg, 1.83 mmol, 1 equiv) in anhydrous DMF (9.2 mL) was added benzyl amine (0.44 mL, 4.04 mmol, 2.2 equiv), ethyl (hydroxyimino)cianoacetate (782 mg, 5.50 mmol, 3 equiv), and Et<sub>3</sub>N (0.77 mL, 5.5 mmol, 3 equiv). The reaction mixture was stirred in an ice bath for 30 min before EDCI (1.06 g, 5.5 mmol, 3 equiv) was added. The reaction mixture was stirred at rt overnight (16 h) and quenched with half-saturated NH<sub>4</sub>Cl (60 mL). The aqueous layer was extracted with EtOAc (3 x 30 mL), and the combined organics were dried (MgSO<sub>4</sub> and Na<sub>2</sub>SO<sub>4</sub>), filtered, and concentrated under reduced pressure. The crude product was purified by flash chromatography using a Biotage<sup>TM</sup> purification system with increasing concentration of EtOAc in hexanes to give title compound (1.10 g, 84% yield) as a yellow solid. Rf: 0.19/7:3/H:E <sup>1</sup>H NMR (400 MHz, CDCl<sub>3</sub>): δ 8.18 (t, *J* = 6 Hz, 2H), 7.32-7.22 (m, 11H), 5.57 (d, *J* = 9.7 Hz, 2H), 4.90 (td, *J* = 4.6, 10.1 Hz, 2H), 4.60 (dd, *J* = 6.6, 15.0, 2H), 4.32 (dd, *J* = 5.4, 15.0, 2H), 3.28-3.17 (m, 4H), 1.23 (s, 18H). <sup>13</sup>C NMR (101 MHz, CDCl<sub>3</sub>): δ 170.70, 155.72, 138.16, 128.58, 127.70, 127.37, 79.99, 55.22, 43.44, 37.74, 28.17; IR (neat) 3252, 3029, 2909, 1685, 1549, 1505, 1469, 1456, 1256, 1121, 753, 699 cm<sup>-1</sup>; HRMS (ESI) calcd for C<sub>30</sub>H<sub>43</sub>N<sub>4</sub>O<sub>6</sub>Se<sub>2</sub> (M+H)<sup>+</sup> 715.1513, found 715.1513

**(2*R*,2'*R*)-3,3'-diselanediybis(2-amino-*N*-benzylpropanamide) dihydrochloride (5):** To di-*N*-*boc*-selenocystine-*bis*-benzyl amide (1.10 g, 1.54 mmol, 1 equiv) was added dioxane (2 mL) and the suspension was placed in an ice bath. 4 M HCl in dioxane (3.9 mL, 15.4 mmol, 10 equiv) was added dropwise and the resulting brown solution was stirred at rt overnight (12 h). The reaction mixture was concentrated under reduced pressure to give title compound

(731 mg, 81%) as a beige solid that was used in the next step without further purification.  $^1\text{H}$  NMR (400 MHz,  $\text{DMSO}-d_6$ ):  $\delta$  9.48 (t,  $J = 6$  Hz, 2H), 8.66 (s, 6H), 7.36-7.29 (m, 8H), 7.29-7.22 (m, 2H), 4.40-4.29 (m, 4H), 4.19 (t,  $J = 6.4$  Hz, 2H), 3.57 (dd,  $J = 6, 12.8$  Hz, 2H), 3.45 (dd,  $J = 7.0, 12.9$ , 2H).  $^{13}\text{C}$  NMR (101 MHz,  $\text{DMSO}-d_6$ ):  $\delta$  167.01, 138.35, 128.24, 127.35, 126.91, 52.58, 42.37, 29.46; IR (neat) 3252, 2919, 1687, 1550, 1471, 1304, 1257, 1058, 751, 699  $\text{cm}^{-1}$ ; HRMS (ESI) calcd for  $\text{C}_{20}\text{H}_{27}\text{N}_4\text{O}_2\text{Se}_2$  ( $\text{M}+\text{H}$ ) $^+$  515.0464, found 515.0464

***N,N'*-((2*R*,2'*R*)-diselanediy)bis(1-(benzylamino)-1-oxopropane-3,2-diyl) dibenzamide (1):** To Selenocystine-*bis*-benzyl amide dihydrochloride (717 mg, 1.23 mmol, 1 equiv) suspended in  $\text{CH}_2\text{Cl}_2$  (4.7 mL) was added DMF (1 mL) forming a brown solution.  $\text{Et}_3\text{N}$  (0.79 mL, 5.64 mmol, 4.6 equiv) was then added and the solution was placed in an ice bath. Benzoyl chloride (0.34 mL, 2.94 mmol, 2.4 equiv) dissolved in  $\text{CH}_2\text{Cl}_2$  (0.52 mL) was added dropwise and the resulting brown suspension was stirred at rt overnight. After 14 h, the reaction mixture had formed a thick suspension and was not stirring. DMF (*ca* 2 mL) was added resulting in a brown suspension. The suspension was stirred for a further 2.5 h, diluted with  $\text{CH}_2\text{Cl}_2$  (30 mL), washed successively with HCl (30 mL, 10 %), water,  $\text{NaHCO}_3$ , and brine, and purified by flash chromatography using a Biotage<sup>TM</sup> purification system with increasing concentration of EtOAc in  $\text{CH}_2\text{Cl}_2$  (up to 50 %) to give title compound (883 mg, 70%) as a yellow solid.  $^1\text{H}$  NMR (400 MHz,  $\text{CDCl}_3$ ):  $\delta$  8.90 (t,  $J = 5.4$  Hz, 2H), 7.50-7.30 (m, 24H), 5.76 (td,  $J = 5.0, 9.6$  Hz, 2H), 4.58 (dd,  $J = 5.7, 14.7$  Hz, 2H), 4.47 (dd,  $J = 5.0, 14.7$  Hz, 2H), 3.49-3.34 (m, 4H).  $^{13}\text{C}$  NMR (101 MHz,  $\text{CDCl}_3$ ):  $\delta$  170.59, 167.43, 137.64, 133.28, 131.89, 128.72, 128.54, 128.24, 127.52, 127.14, 54.56, 44.03, 36.69; IR (neat) 3269, 1668, 1634, 1578, 1533, 1490, 1454, 1288, 1241, 665  $\text{cm}^{-1}$ ; HRMS (ESI) calcd for  $\text{C}_{34}\text{H}_{35}\text{N}_4\text{O}_4\text{Se}_2$  ( $\text{M}+\text{H}$ ) $^+$  723.0989, found 723.0986

### 3.2. Selenocysteine Conjugation

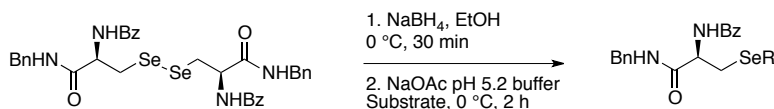

#### General Procedure for Conjugation Conditions

*Bis*-(BzHN-Sec-benzamide) (**1**, 67.8 mg, 0.094 mmol, 1.0 equiv) was suspended in EtOH (2.6 mL, degassed by bubbling argon through for about 20 minutes). The suspension was placed in an ice bath before  $\text{NaBH}_4$  (10.7 mg, 0.282 mmol, 3.0 equiv) was added in one portion. The reaction mixture bubbled and formed a yellow solution and

then a white precipitate. The reaction was stirred in the ice bath for 30 min. NaOAc buffer (pH 5.2, 2.6 mL, degassed by bubbling argon through for about 20 min) was added to the reaction followed by substrate (2.5 equiv). The resulting suspension was stirred in the ice bath for 2 h, partitioned between half-saturated brine (25 mL) and EtOAc (30 mL), extracted with EtOAc (2 x 30 mL), washed with brine, dried (MgSO<sub>4</sub> and Na<sub>2</sub>SO<sub>4</sub>), and filtered. The crude product was purified by flash chromatography with increasing concentration of EtOAc in hexanes (up to 60%).

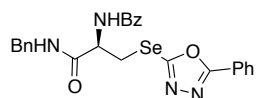

**(R)-N-(1-(benzylamino)-1-oxo-3-((5-phenyl-1,3,4-oxadiazol-2-yl)selenanyl)propan-2-yl)benzamide (Sec-ODA, 11):** *Bis*-(BzHN-Sec-benzamide (**1**, 62.2 mg, 0.093 mmol, 0.83

equiv) was suspended in MeOH (3.1 mL, degassed by bubbling argon through, 1 min/mL) in a 10 mL 2-neck round bottom flask. The suspension was placed in an ice bath before NaBH<sub>4</sub> (10.5 mg, 0.279 mmol, 2.5 equiv) was added in one portion. The reaction was stirred for 3 min after which NaOAc buffer (pH 5.2, 3.1 mL, degassed by bubbling argon through, 1 min/mL) was added followed by phenyl methyl sulfone<sup>1</sup> (**6**, 25 mg, 0.111 mmol, 1 equiv). The reaction mixture was stirred for an overall 4 h, quenched by the addition of water, extracted with EtOAc, dried, filtered, and concentrated under reduced pressure. The crude product was purified by flash chromatography with a Biotage™ purification system with increasing concentration of EtOAc in hexanes to give 26.9 mg of Sec-ODA as a brown solid (44%): <sup>1</sup>H NMR (400 MHz, CDCl<sub>3</sub>) δ 8.24 (d, *J* = 6.5 Hz, 1H), 8.04-7.99 (m, 2H), 7.95-7.90 (m, 2H), 7.58-7.42 (m, 8H), 7.41-7.20 (m, 7H), 5.23 (td, *J* = 6.5, 3.6 Hz, 1H), 4.49 (d, *J* = 5.9 Hz, 2H), 3.88 (dd, *J* = 13.5, 6.6 Hz, 1H), 3.76 (dd, *J* = 13.6, 3.7 Hz, 1H); <sup>13</sup>C NMR (101 MHz, CDCl<sub>3</sub>) δ 170.08, 168.40, 167.34, 158.69, 137.65, 132.76, 132.17, 131.94, 129.09, 128.66, 127.50, 127.47, 127.44, 126.79, 123.27, 54.34, 43.65, 29.74; IR (neat) 3311, 1623, 1524, 1467, 1167, 663 cm<sup>-1</sup>; HRMS (ESI) calcd for C<sub>25</sub>H<sub>23</sub>N<sub>4</sub>O<sub>3</sub>Se (M+H)<sup>+</sup> 507.0935, found 507.0929

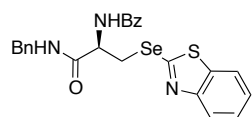

**(R)-N-(3-(benzo[*d*]thiazol-2-yl)selenanyl)-1-(benzylamino)-1-oxopropan-2-yl)benzamide**

**(Sec-BTA, 12):** Substrate 2-(methylsulfonyl)benzo[*d*]thiazole<sup>1</sup> (**8**, 50.2 mg, 0.235 mmol, 2.5 equiv) was used to give 79.4 mg of product (85%) as a yellow solid: <sup>1</sup>H NMR (400

MHz, CDCl<sub>3</sub>): δ 8.82 (d, *J* = 5.6 Hz, 1H), 7.85-7.80 (m, 3H), 7.71-7.64 (m, 1H), 7.53 (bt, *J* = 5.2 Hz, 1H), 7.50-7.44 (m, 1H), 7.41 (ddd, *J* = 8.2, 7.2, 1.4 Hz, 1H), 7.38-7.35 (m, 1H), 7.34-7.27 (m, 6H), 7.25-7.21 (m, 1H), 5.17 (td, *J* = 6.3, 3.4 Hz, 1H), 4.50 (d, *J* = 5.7 Hz, 2H), 3.99 (dd, *J* = 13.7, 6.8 Hz, 1H), 3.74 (dd, *J* = 13.7, 3.4 Hz, 1H); <sup>13</sup>C NMR

(101 MHz, CDCl<sub>3</sub>) δ 170.47, 168.97, 161.36, 153.02, 137.89, 136.82, 133.23, 131.97, 128.67, 128.54, 127.52, 127.38, 126.24, 124.90, 121.31, 121.27, 55.13, 43.60, 29.95; IR (neat) 3287, 1634, 1523, 1454, 1423, 967, 753, 664 cm<sup>-1</sup>; HRMS (ESI) calcd for C<sub>24</sub>H<sub>22</sub>N<sub>3</sub>O<sub>2</sub>Se (M+H)<sup>+</sup> 496.0598, found 496.0598.

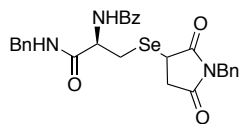

***N*-((2*R*)-3-((1-benzyl-2,5-dioxopyrrolidin-3-yl)selanyl)-1-(benzylamino)-1-oxopropan-2-yl)benzamide (Sec-MAL, 13):** Substrate *N*-benzyl maleimide (108.08 mg, 0.376 mmol, 4 equiv) was used to give 32.9 mg of product (32%) as a brown solid and as a mixture of

diastereomers: <sup>1</sup>H NMR (400 MHz, Chloroform-*d*) δ 7.90-7.83 (m, 2H), 7.57-7.50 (m, 1H), 7.50-7.42 (m, 2H), 7.42-7.21 (m, 11H), 5.08-4.95 (m, 1H), 4.74-4.38 (m, 4.5H), 4.25 (dd, *J* = 9.3, 3.9 Hz, 0.6H), 3.86-3.66 (m, 1H), 3.32-3.21 (m, 1H), 3.15-3.04 (m, 1H), 2.58 (ddd, *J* = 20.7, 19.1, 3.8 Hz, 1H); <sup>13</sup>C NMR (101 MHz, CDCl<sub>3</sub>) δ 178.88, 178.81, 174.42, 174.24, 170.27, 170.13, 167.82, 167.46, 137.68, 137.60, 135.22, 135.19, 134.19, 133.34, 133.19, 132.06, 132.03, 128.72, 128.66, 128.63, 128.57, 128.38, 128.12, 127.72, 127.63, 127.51, 127.48, 127.40, 127.23, 53.73, 52.93, 43.73, 42.82, 41.43, 36.50, 35.94, 30.71, 30.04, 29.71, 28.09, 27.39; IR (neat) 3298, 2927, 1774, 1699, 1635, 1531, 1396, 1340, 1167, 908, 727, 664 cm<sup>-1</sup>; HRMS (ESI) calcd for C<sub>28</sub>H<sub>28</sub>N<sub>3</sub>O<sub>4</sub>Se (M+H)<sup>+</sup> 550.1245, found 550.1241

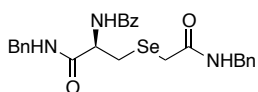

**(*R*)-*N*-(1-(benzylamino)-3-((2-(benzylamino)-2-oxoethyl)selanyl)-1-oxopropan-2-yl)benzamide (Sec-IAM, 14):** Substrate *N*-benzyl-2-iodoacetamide<sup>2</sup> (**9**, 64.7 mg, 0.253

mmol, 2.5 equiv) was used to give 48 mg of product (50%) was a white solid: <sup>1</sup>H NMR (400 MHz, CDCl<sub>3</sub>): δ 7.84-7.74 (m, 2H), 7.57-7.47 (m, 1H), 7.48-7.39 (m, 2H), 7.36-7.17 (m, 12H), 4.77 (dd, *J* = 7.6, 5.1 Hz, 1H), 4.49-4.36 (m, 4H), 3.40-3.25 (m, 2H), 3.19 (dd, *J* = 13.5, 4.9 Hz, 1H), 2.90 (dd, *J* = 13.5, 7.8 Hz, 1H); <sup>13</sup>C NMR (101 MHz, CDCl<sub>3</sub>:CH<sub>3</sub>OD/15:1) δ 171.16, 170.51, 167.82, 137.77, 137.47, 133.13, 131.93, 128.49, 128.48, 128.45, 127.64, 127.50, 127.32, 127.16, 53.36, 43.84, 43.59, 26.73, 25.47; IR (neat) 3298, 1657, 1633, 1522, 1453, 694, 663 cm<sup>-1</sup>; HRMS (ESI) calcd for C<sub>26</sub>H<sub>28</sub>N<sub>3</sub>O<sub>3</sub>Se (M+H)<sup>+</sup> 510.1296, found 510.1294

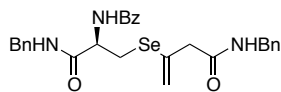

**(*R*)-*N*-(1-(benzylamino)-3-((4-(benzylamino)-4-oxobut-1-en-2-yl)selanyl)-1-oxopropan-2-yl)benzamide (Sec-ALL, 15):** Substrate *N*-benzylbuta-2,3-dienamide<sup>3</sup>

(**10**, 65.2 mg, 0.376 mmol, 4 equiv) was used to give 83.6 mg of product (83%) as a brown solid:

$^1\text{H}$  NMR (400 MHz, DMSO- $d_6$ )  $\delta$  8.72 (d,  $J$  = 8.0 Hz, 1H), 8.63 (t,  $J$  = 6.0 Hz, 1H), 8.44 (t,  $J$  = 6.0 Hz, 1H), 7.95-7.89 (m, 2H), 7.58-7.51 (m, 1H), 7.51-7.44 (m, 2H), 7.34-7.17 (m, 11H), 5.62 (s, 1H), 5.31 (s, 1H), 4.73 (ddd,  $J$  = 9.7, 7.8, 4.9 Hz, 1H), 4.31 (dd,  $J$  = 6.0, 3.2 Hz, 2H), 4.25 (d,  $J$  = 6.0 Hz, 2H), 3.26 (dd,  $J$  = 12.2, 5.0 Hz, 1H), 3.23 (s, 2H), 3.14 (dd,  $J$  = 12.3, 9.7 Hz, 1H);  $^{13}\text{C}$  NMR (101 MHz, DMSO- $d_6$ )  $\delta$  170.33, 168.51, 166.43, 139.27, 139.24, 134.71, 133.92, 131.41, 128.22, 128.20, 128.17, 127.61, 127.20, 127.03, 126.73, 126.69, 116.73, 53.48, 45.81, 42.22, 27.14; IR (neat) 3298, 2974, 1640, 1534, 1086, 1045, 879, 697  $\text{cm}^{-1}$ ; HRMS (ESI) calcd for  $\text{C}_{28}\text{H}_{30}\text{N}_3\text{O}_3\text{Se}$  ( $\text{M}+\text{H}$ ) $^+$  536.1452, found 536.1451

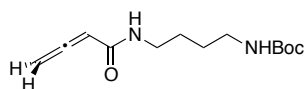

***tert*-Butyl (4-(buta-2,3-dienamido)butyl)carbamate (21):** 3-butynoic acid (100 mg,

1.13 mmol, 1.0 equiv) and 2-chloro-1-methyl pyridinium iodide (Mukaiyama's reagent, 446 mg, 1.70 mmol, 1.5 equiv) were suspended in  $\text{CH}_2\text{Cl}_2$  (4.1 mL) and the resulting yellow suspension was stirred at rt for 1 h. A solution of boc-1,4-diaminobutane (0.27 mL, 1.36 mmol, 1.2 equiv) and  $\text{Et}_3\text{N}$  (0.24 mL, 1.70 mmol, 1.5 equiv) in  $\text{CH}_2\text{Cl}_2$  (2.0 mL) was added dropwise (10 minutes) after which the resulting yellow solution was stirred at rt for another 30 min. Additional  $\text{Et}_3\text{N}$  (0.24 mL, 1.70 mmol, 1.5 equiv) was added and the resulting red solution was stirred at room temperature for 15 h, concentrated under reduced pressure, diluted with EtOAc, and washed with water. The aqueous layer was extracted once with EtOAc, the combined organics were washed with brine, dried ( $\text{Na}_2\text{SO}_4$  and  $\text{MgSO}_4$ ), and concentrated under reduced pressure. The crude product was purified by flash chromatography with increasing concentration of EtOAc in hexanes (up to 100%) to give product (127 mg, 44%) as a white solid:  $^1\text{H}$  NMR (400 MHz,  $\text{CDCl}_3$ )  $\delta$  5.95 (s, 1H), 5.62 (t,  $J$  = 6.6 Hz, 1H), 5.21 (d,  $J$  = 6.7 Hz, 2H), 4.59 (s, 1H), 3.36-3.25 (m, 2H), 3.18-3.07 (m, 2H), 1.60-1.47 (m, 5H), 1.43 (s, 10H);  $^{13}\text{C}$  NMR (101 MHz,  $\text{CDCl}_3$ )  $\delta$  211.75, 164.56, 156.08, 90.84, 80.41, 79.13, 40.10, 39.35, 28.40, 27.52, 26.81; IR (neat) 3346, 3299, 2950, 2878, 1973, 1949, 1681, 1627, 1519, 1277, 1168  $\text{cm}^{-1}$ ; HRMS (ESI) calcd for  $\text{C}_{13}\text{H}_{22}\text{N}_2\text{O}_3\text{Na}$  ( $\text{M}+\text{Na}$ ) $^+$  277.1528, found 277.1524

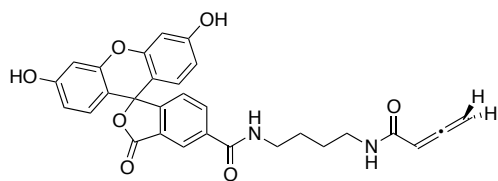

***N*-(4-(buta-2,3-dienamido)butyl)-3',6'-dihydroxy-3-oxo-3H-spiro[isobenzofuran-1,9'-xanthene]-5-carboxamide (Fl-ALL, 19).** *tert*-Butyl (4-(buta-2,3-dienamido)butyl)carbamate (21), 24.6



mg, 0.097 mmol, 1.0 equiv) was dissolved in  $\text{CH}_2\text{Cl}_2$  (0.29 mL) and placed in an ice bath before  $\text{CF}_3\text{CO}_2\text{H}$  (0.19 mL) was added dropwise. The reaction mixture was stirred in the ice bath for 1 h, concentrated under reduced pressure to give *N*-(4-aminobutyl)buta-2,3-dienamide trifluoroacetate salt as a yellow gel. To 5-carboxyfluorescein (18.2 mg, 48  $\mu\text{mol}$ , 1 equiv), EDCI•HCl (18.5 mg, 97  $\mu\text{mol}$ , 2 equiv), and Oxyma (14.1 mg, 97  $\mu\text{mol}$ , 2 equiv) was added DMF (0.5 mL) and  $\text{Et}_3\text{N}$  (20.2  $\mu\text{L}$ ) followed by *N*-(4-aminobutyl)buta-2,3-dienamide trifluoroacetate (13.0 mg, 48  $\mu\text{mol}$ , 1 equiv) in DMF (0.5 mL). The reaction mixture was stirred for 3.5 h, purified by preparative HPLC and lyophilized to give product (5.3 mg, 21%) as a white solid: Retention Time: 6.406 min, LRMS (ESI) calcd for  $\text{C}_{29}\text{H}_{25}\text{N}_2\text{O}_7$   $[\text{M}+\text{H}]^+$  513.17, found 513.5; 90 % purity by LC-MS at 254 nm; HRMS (ESI) calcd for  $\text{C}_{29}\text{H}_{25}\text{N}_2\text{O}_7$   $(\text{M}+\text{H})^+$  513.1662, found 513.1651

### 3.3. Figures and Schemes

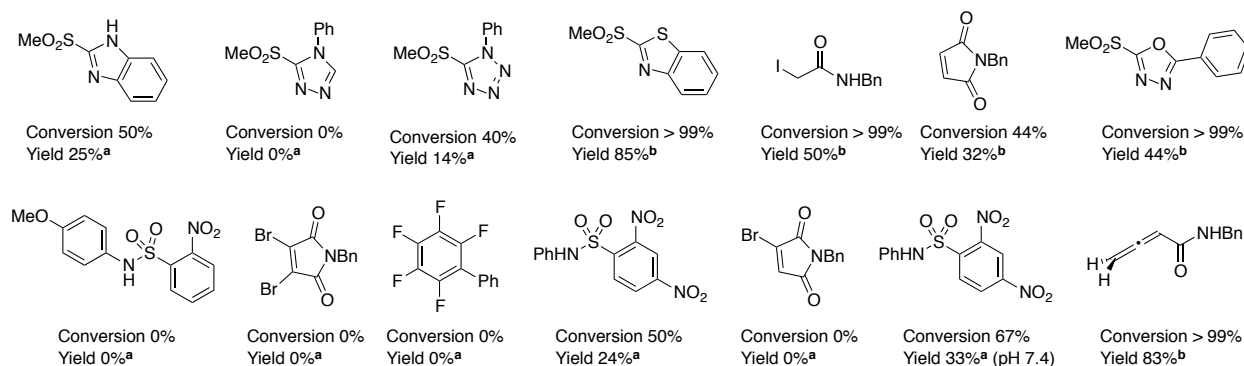

**Fig. S1** All the electrophilic reagents surveyed for selenocysteine conjugation. Conversion determined by <sup>1</sup>H NMR of crude product. <sup>a</sup>Yield determined by LC-MS. <sup>b</sup>Isolated yield.

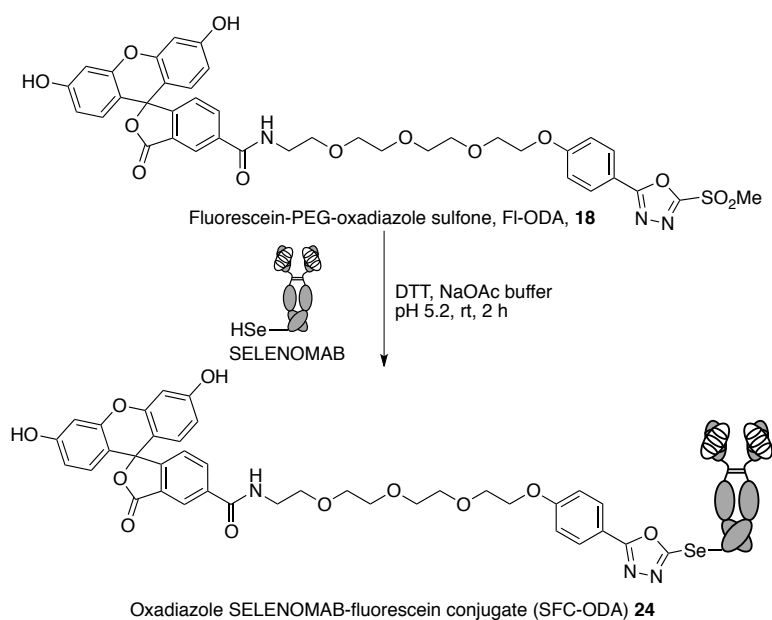

**Scheme S1** Conjugation of SELENOMAB to fluorescein oxadiazole probe to give SELENOMAB-fluorescein conjugate **24** (SFC-ODA)

### 3.4. Antibody Conjugation and Analysis

#### SELENOMAB Conjugation Reactions

The cloning, expression, and purification of trastuzumab scFv-Fc-Sec and scFv-Fc-stop antibody were performed as previously described.<sup>4</sup> Conjugation reactions were carried out using 4  $\mu$ M (~0.5 mg/mL) trastuzumab scFv-Fc-Sec or scFv-Fc-stop and 40  $\mu$ M fluorescein-attached ALL **19** (FI-ALL) or sulfone linker **18** (FI-ODA) in 100 mM sodium acetate (pH 5.2) buffer in the presence of 0.1 mM dithiothreitol (DTT). The reactions were allowed to proceed for indicated time points at room temperature. Unconjugated compounds were removed by using NAP-5 columns (GE healthcare) and buffer-exchanged with PBS. The labeling was analyzed by SDS-PAGE.

## **SDS-PAGE**

2  $\mu\text{g}$  conjugates were incubated at 70 °C for 5 min in NuPAGE LDS Sample Buffer (Life Technologies) supplemented with or without 50 mM DTT and then loaded on a NuPAGE Novex Bis-Tris 4-12% gradient gel (Life Technologies). Following SDS-PAGE and prior to staining with SimplyBlue SafeStain (Life Technologies), a picture of the gel was taken under blue light illumination (Life Technologies) to record the fluorescence.

## **Analysis of HER2 Binding by Flow Cytometry**

Human breast cancer cell lines SK-BR-3 and MDA-MB-468 were maintained at 37 °C in a humidified 5% CO<sub>2</sub> atmosphere in DMEM completed with 10% FBS and 1% Pen Strep.  $2 \times 10^5$  cells were distributed in each well of a V-shaped 96-well plate. The cells were incubated with 10  $\mu\text{g}$  SELENOMAB-fluorescein conjugates for 30 min on ice. Samples were washed three times with 200  $\mu\text{L}$  FACS buffer and transferred to FACS tubes. Fluorescence was measured on an LSR II Flow Cytometer (Becton-Dickinson), and data were analyzed using FlowJo software (Tree Star, Inc.).

## **Human plasma stability**

Conjugate plasma stability was carried out as previously described.<sup>5</sup> In brief, SELENOMAB-fluorescein conjugates at a concentration of 1 mg/mL were diluted 1:1 (v/v) into human plasma and incubated at 37 °C for the duration of the study. Aliquots were removed at various time points (0, 4, 8, 12, 24, 48, and 72 h) and stored at -80 °C, and then SDS-PAGE was performed as above.

## 4. NMR Spectra

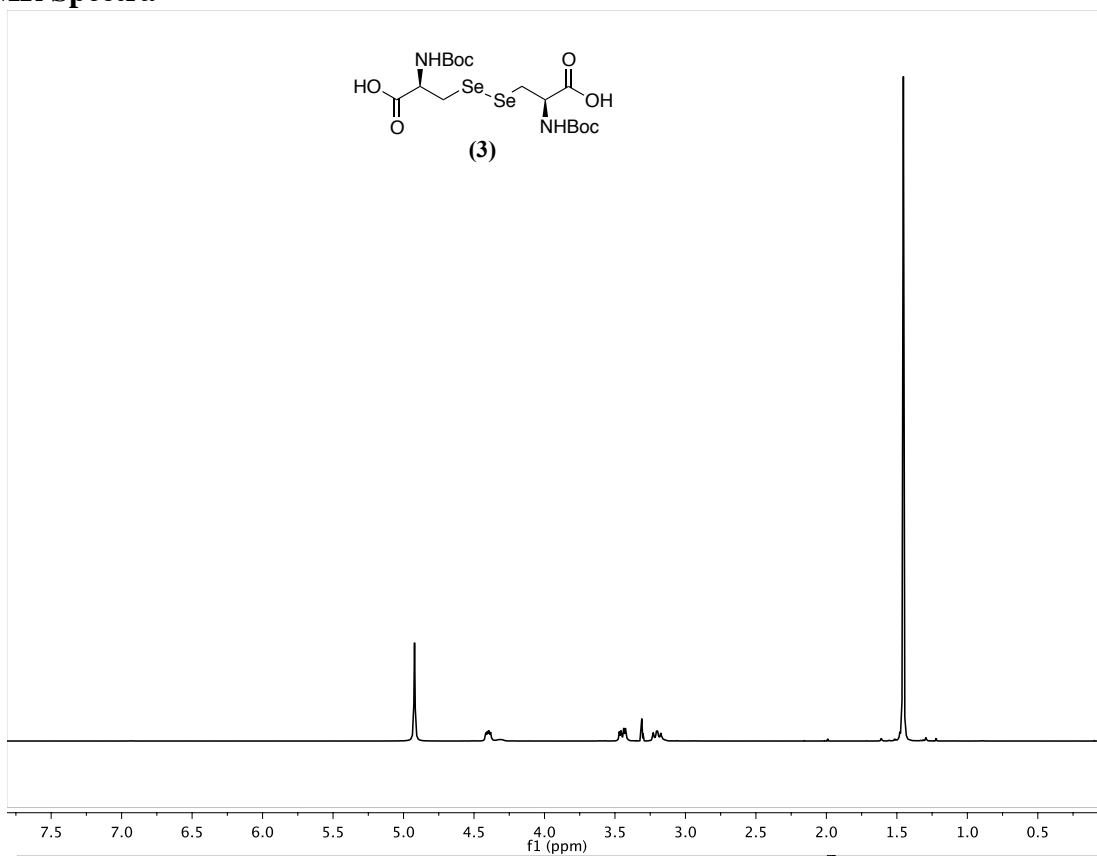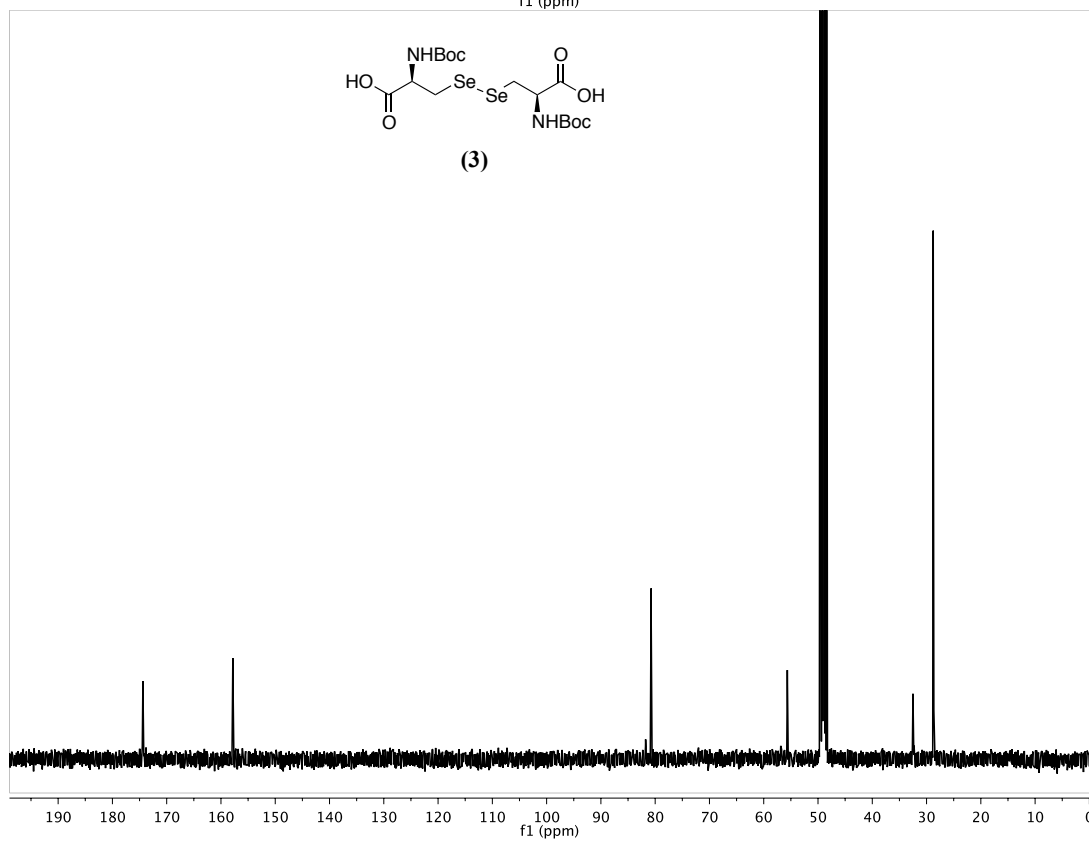

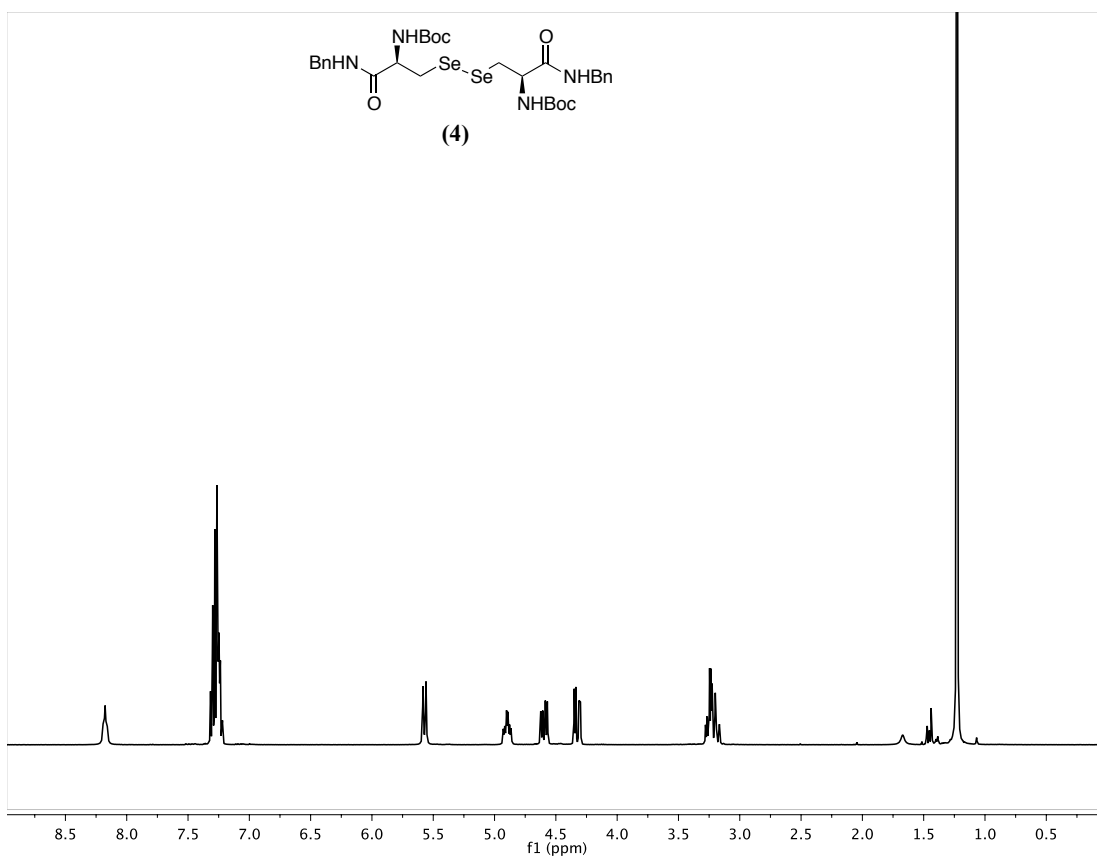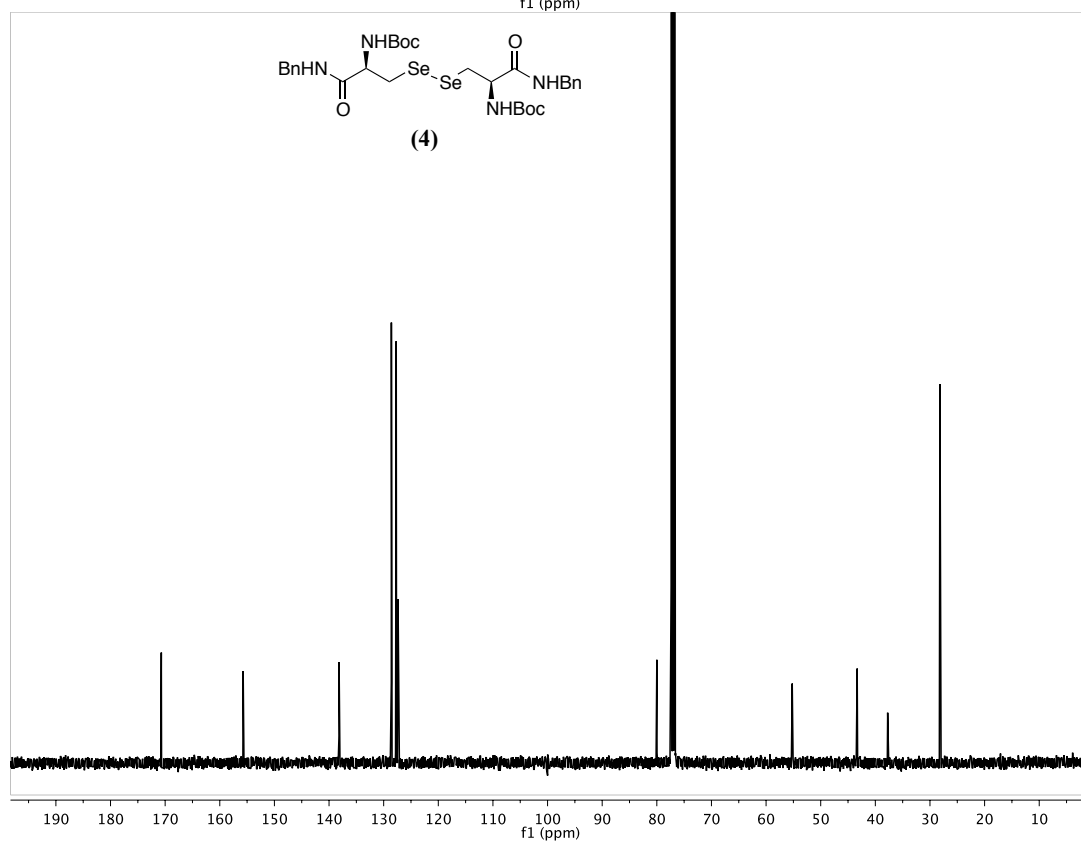

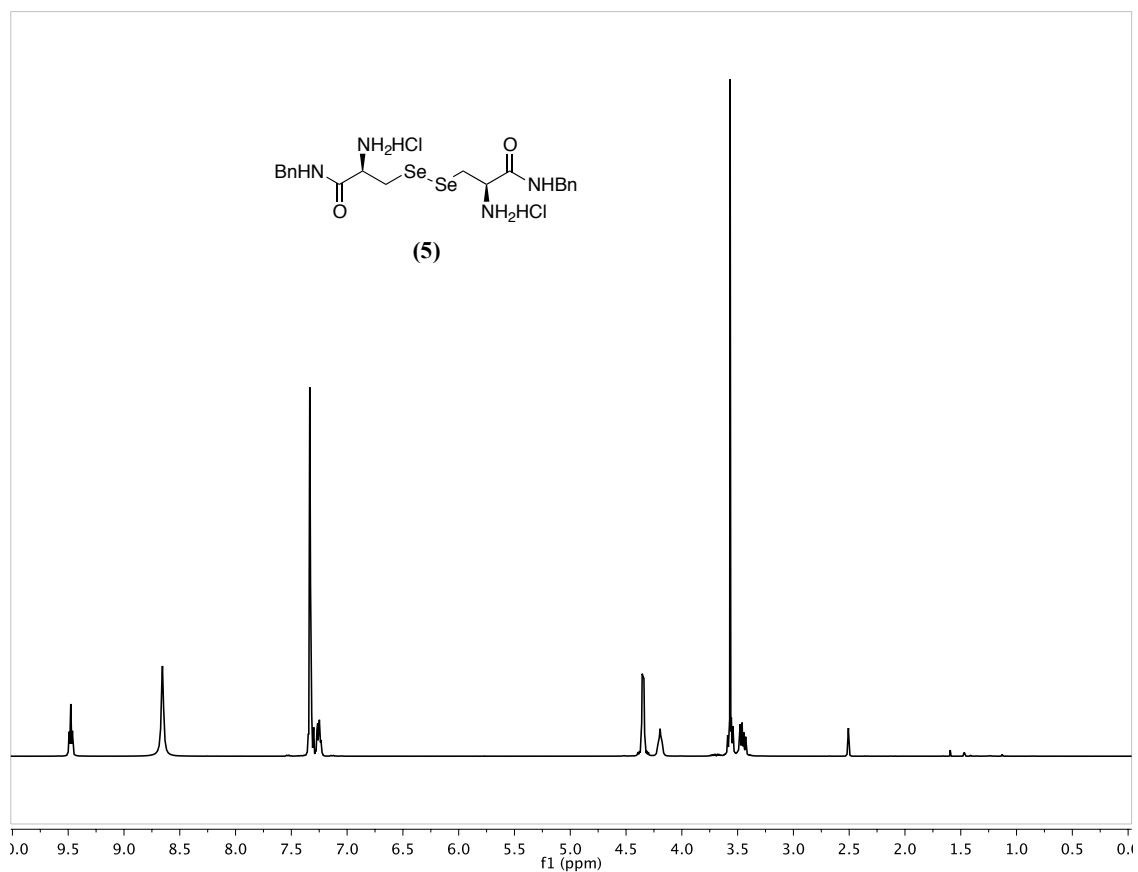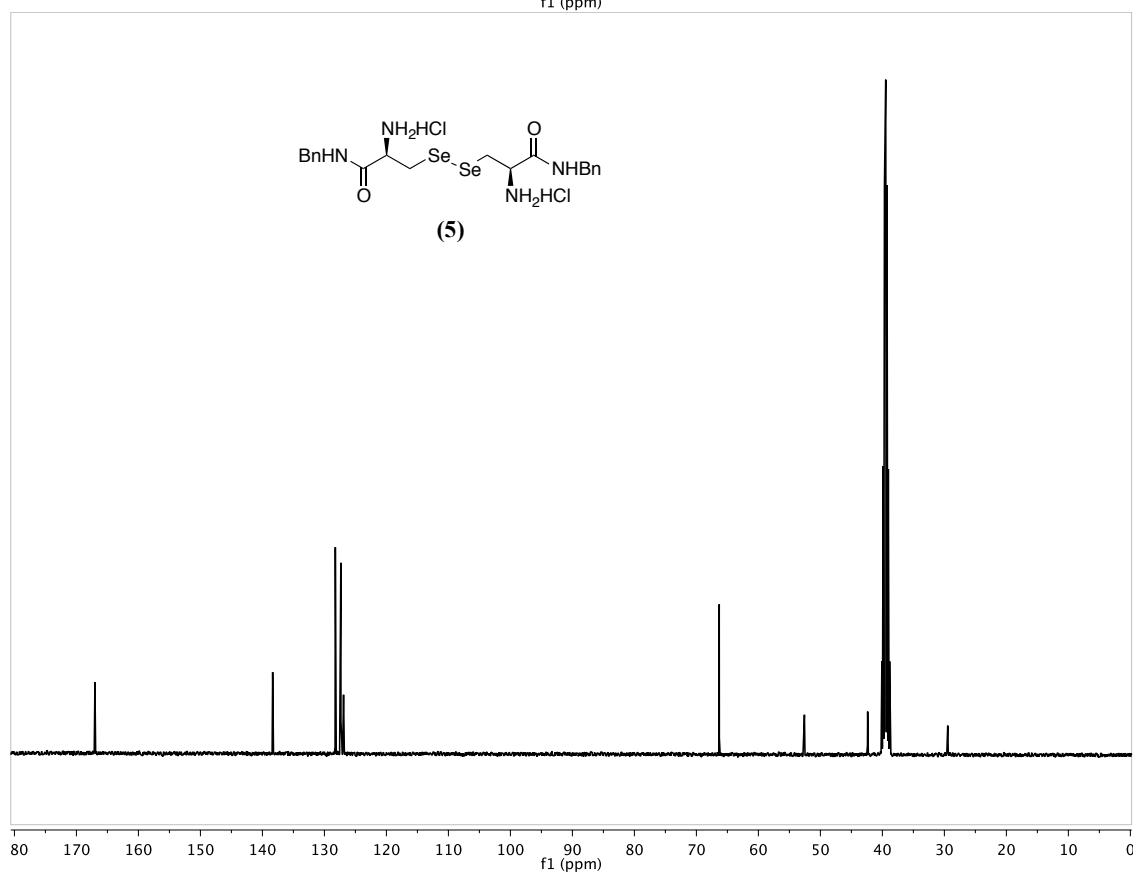

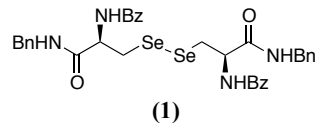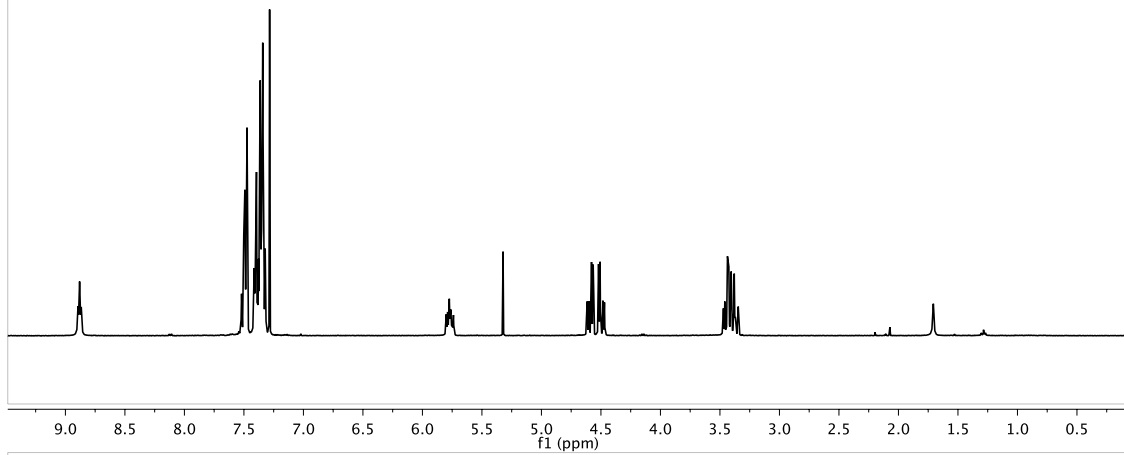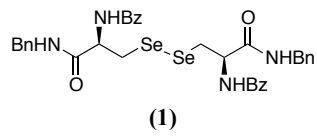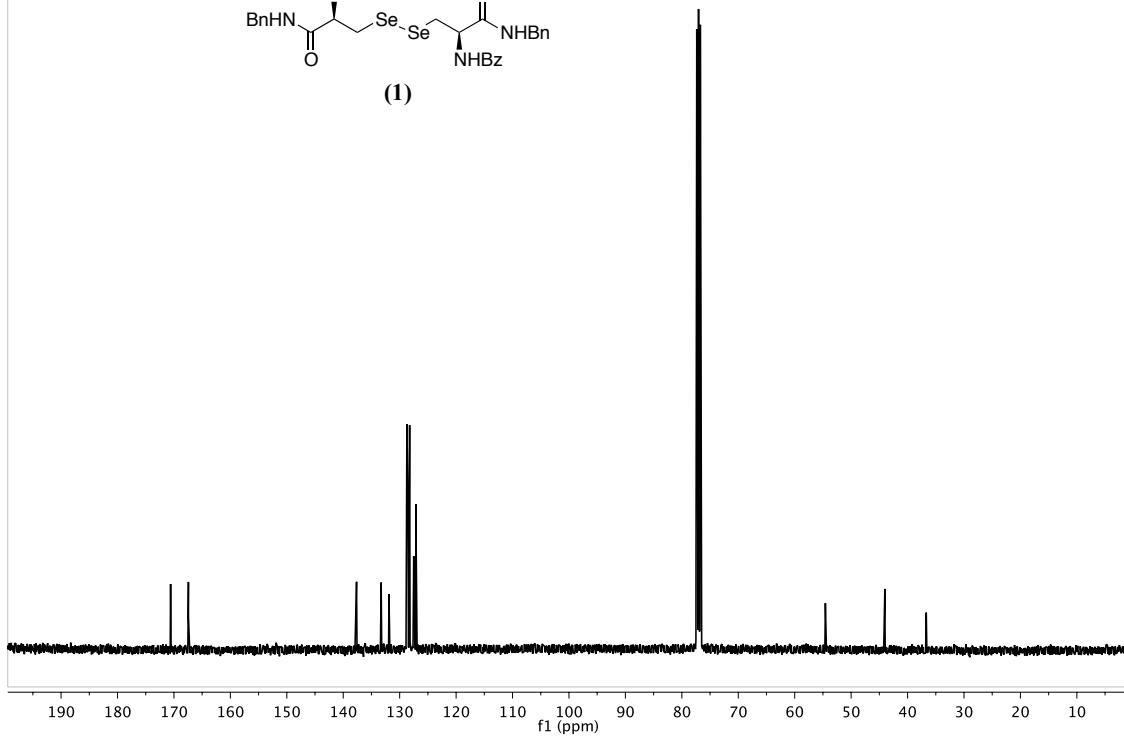

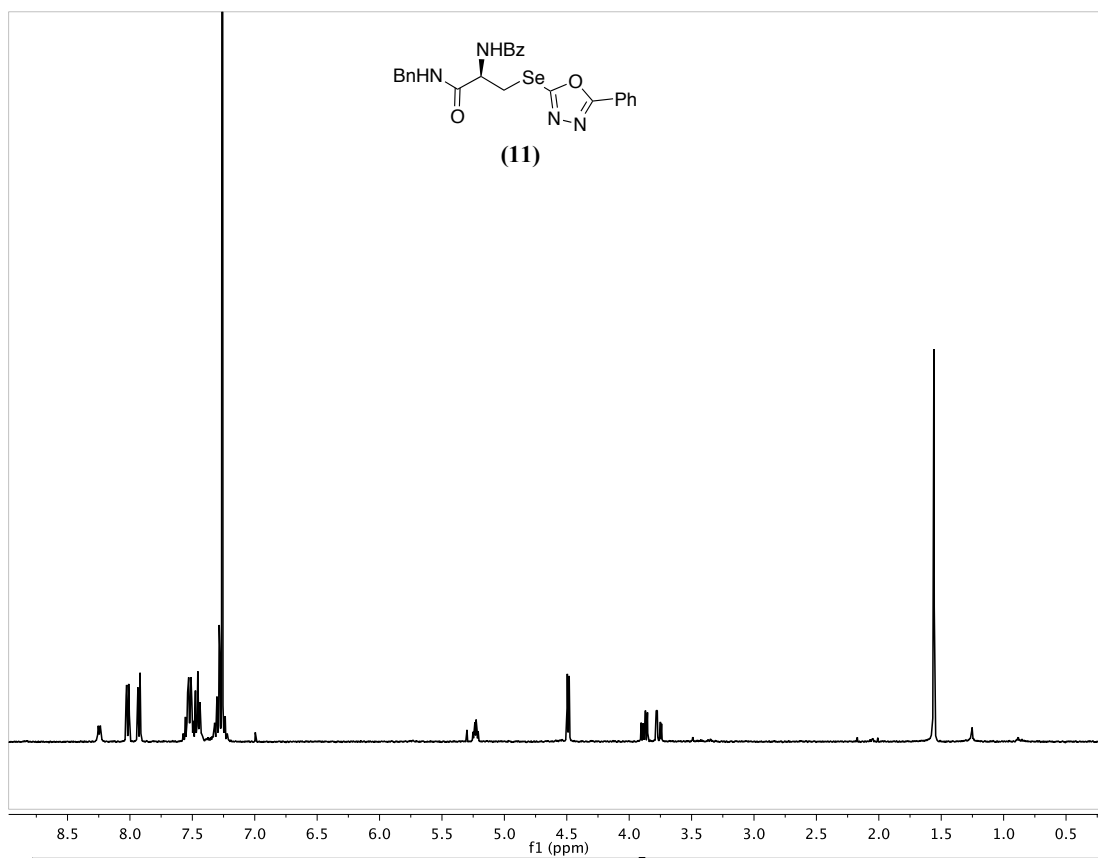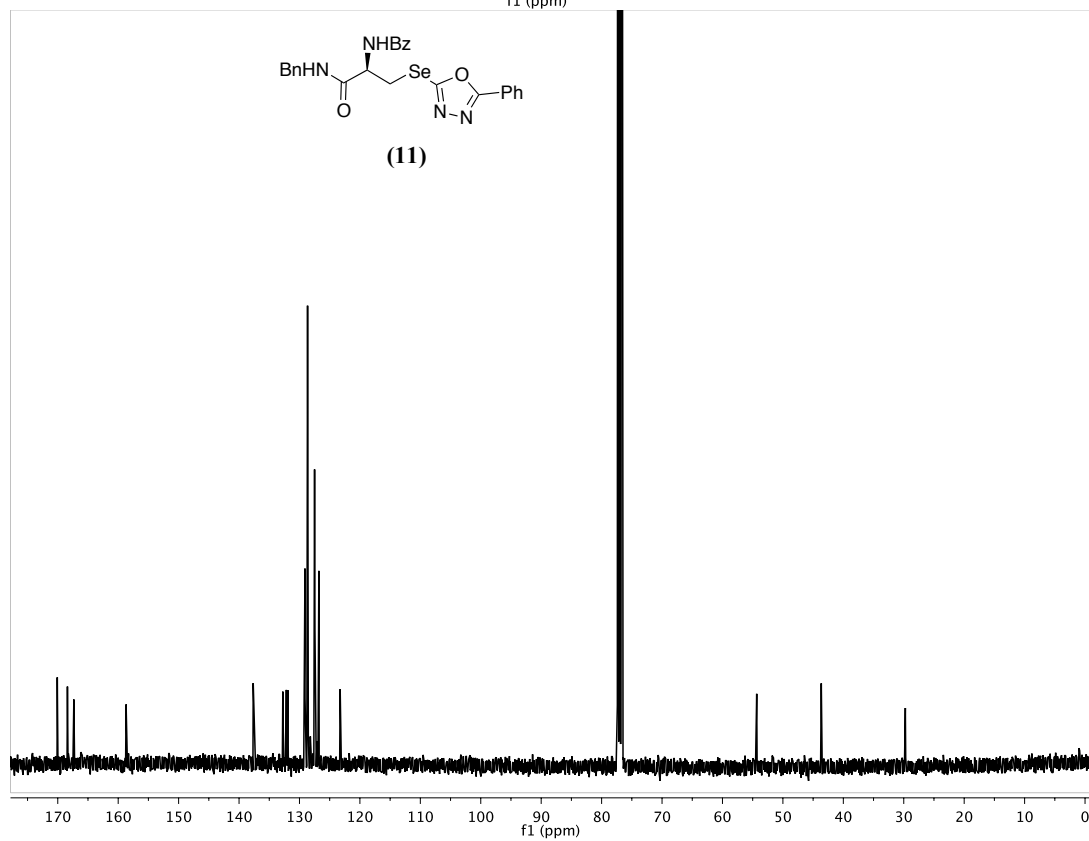



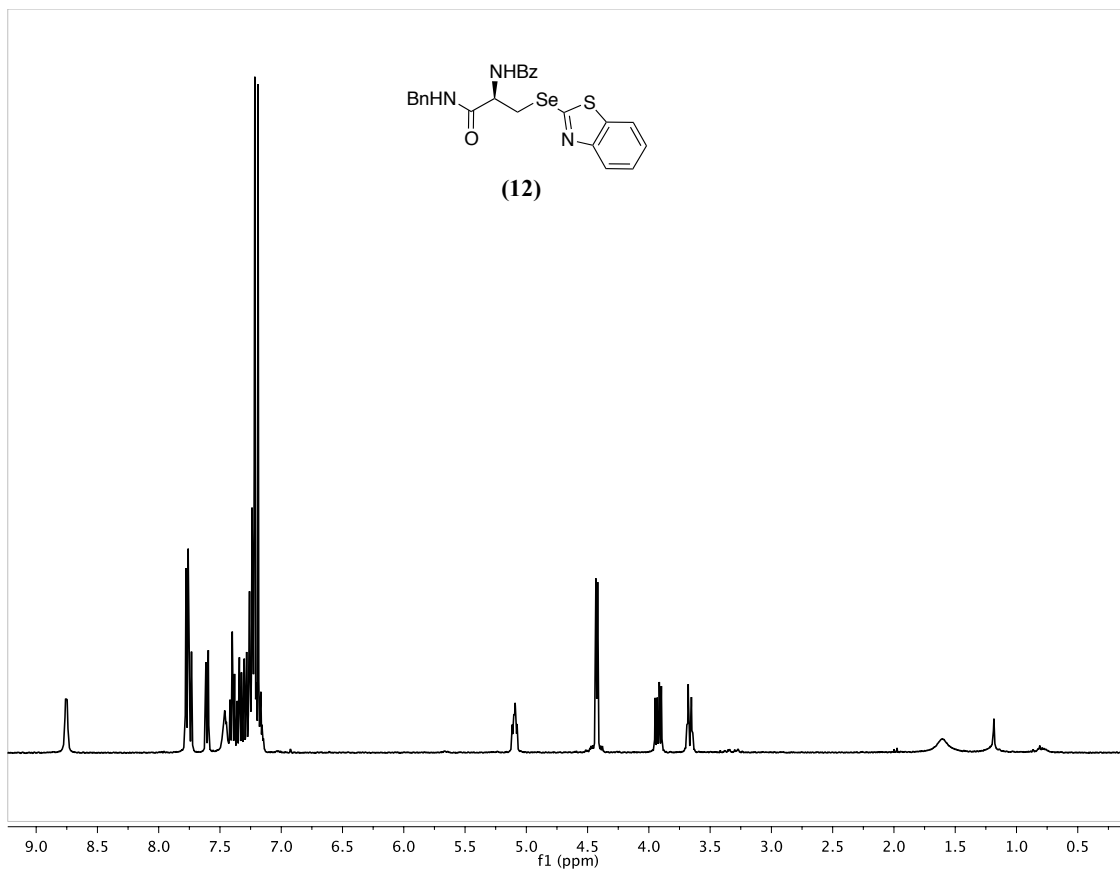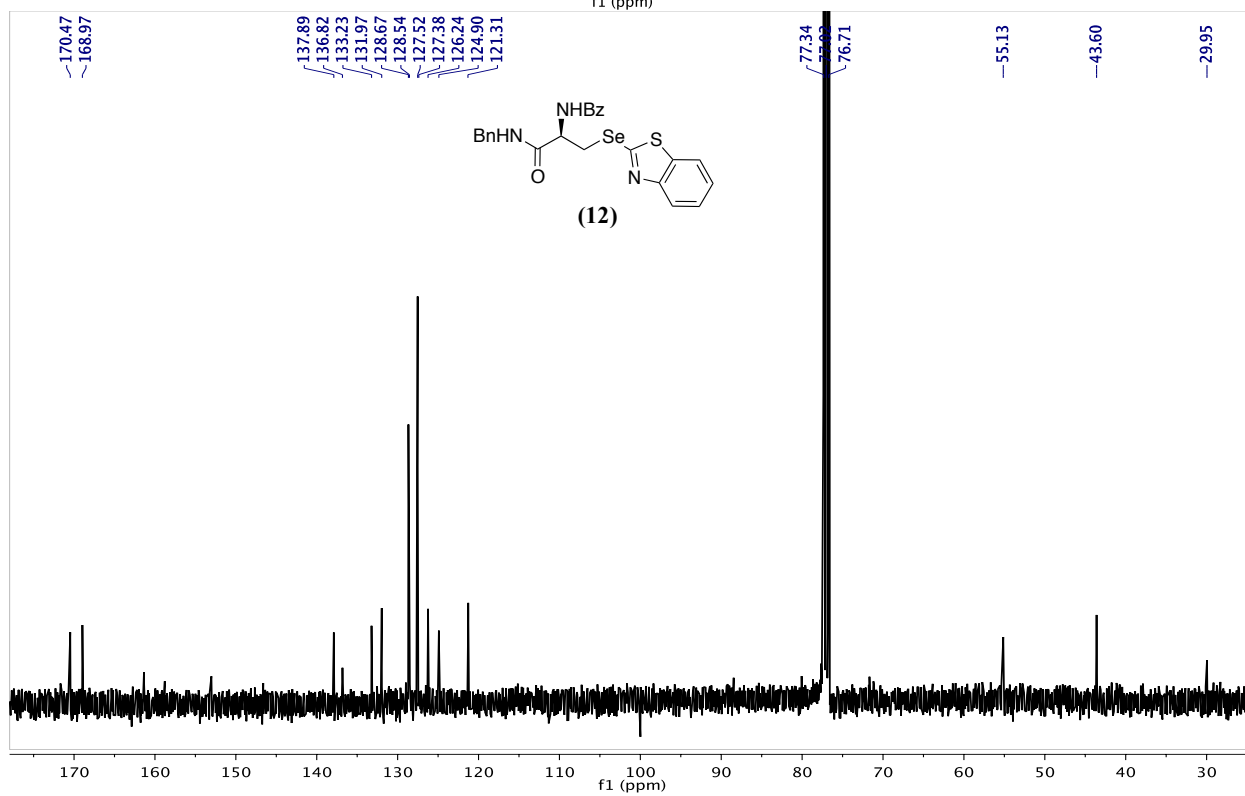

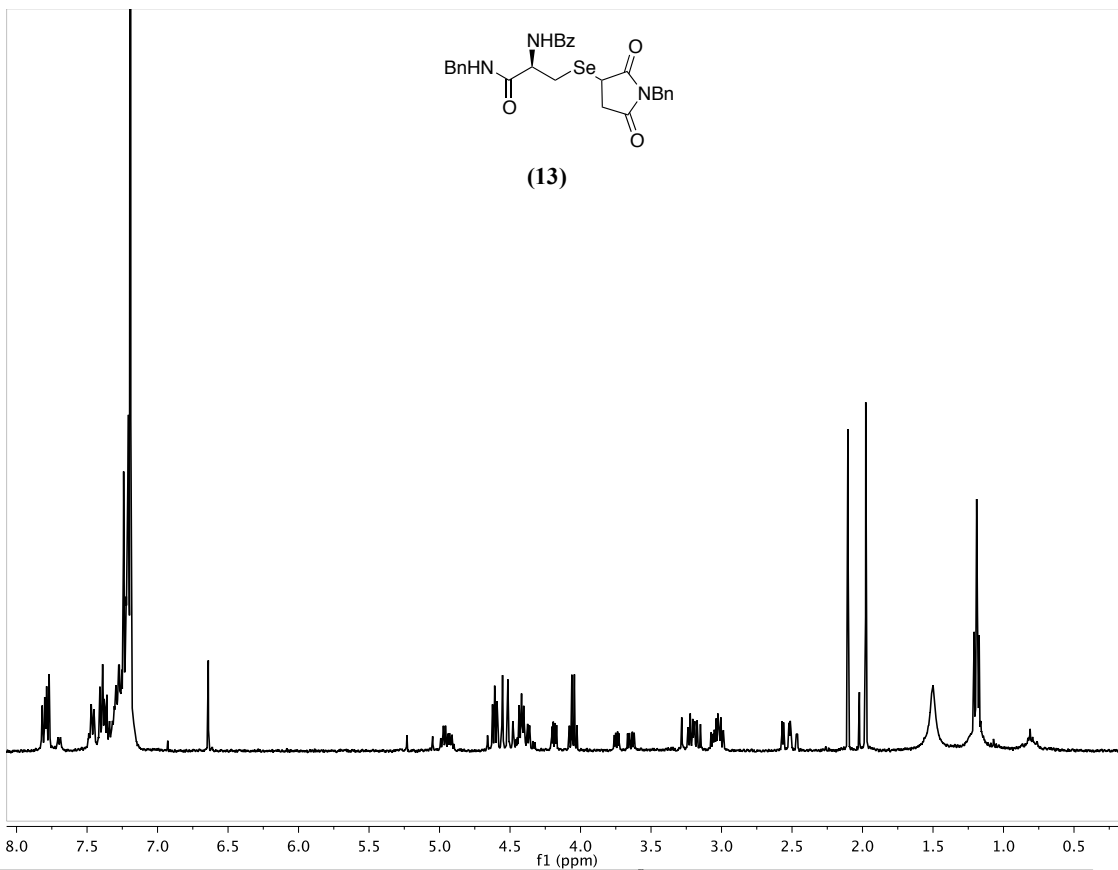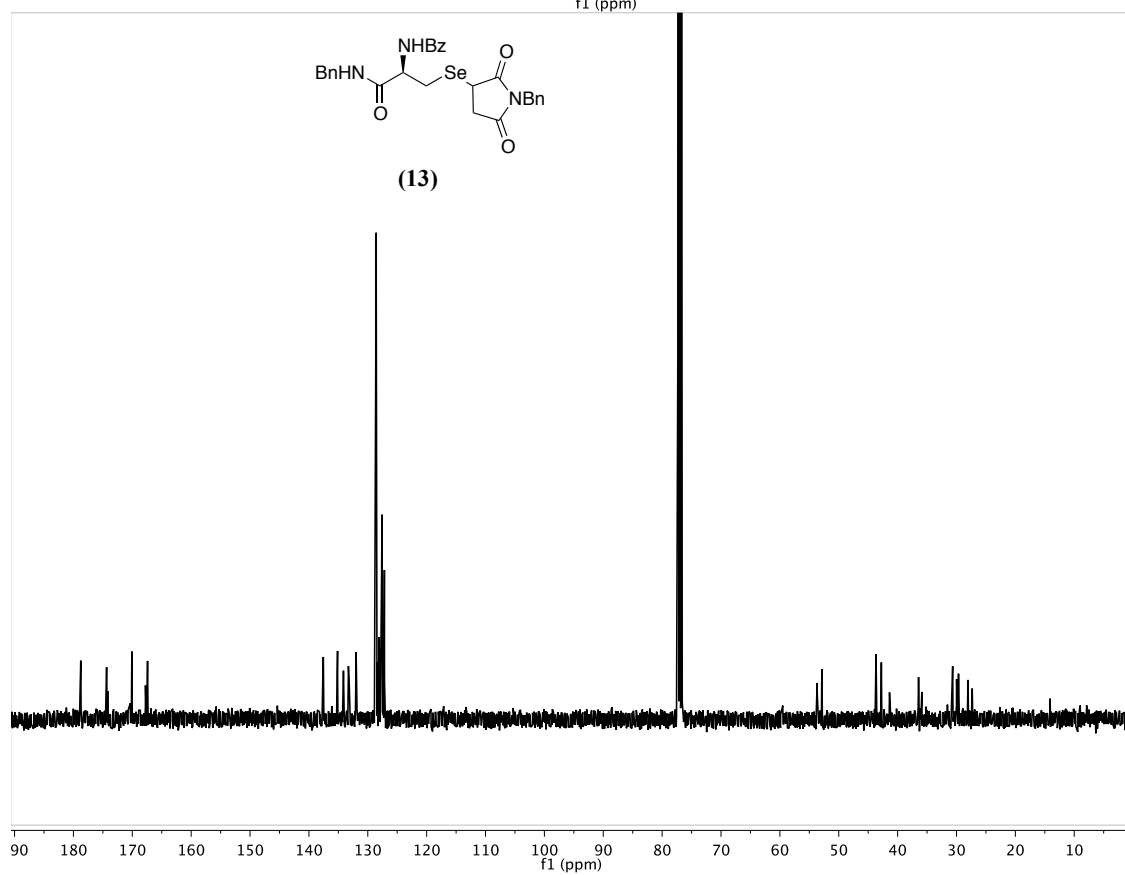

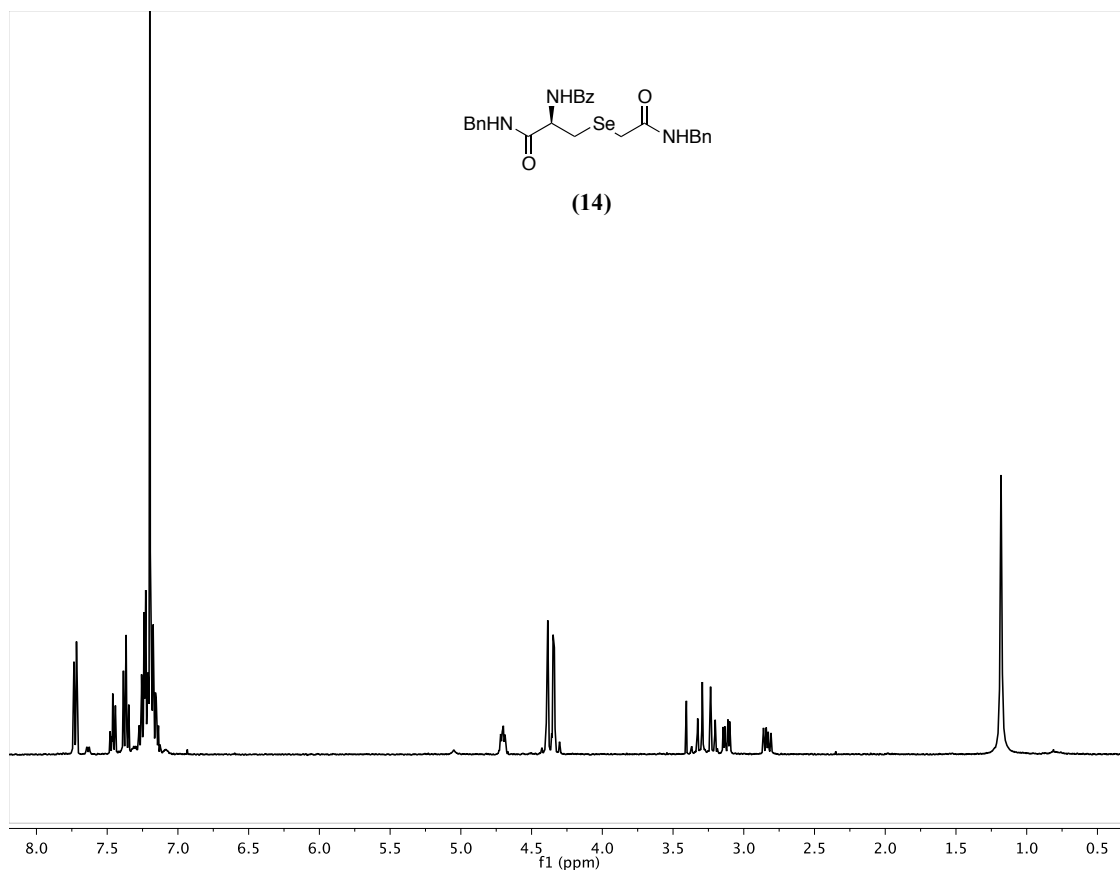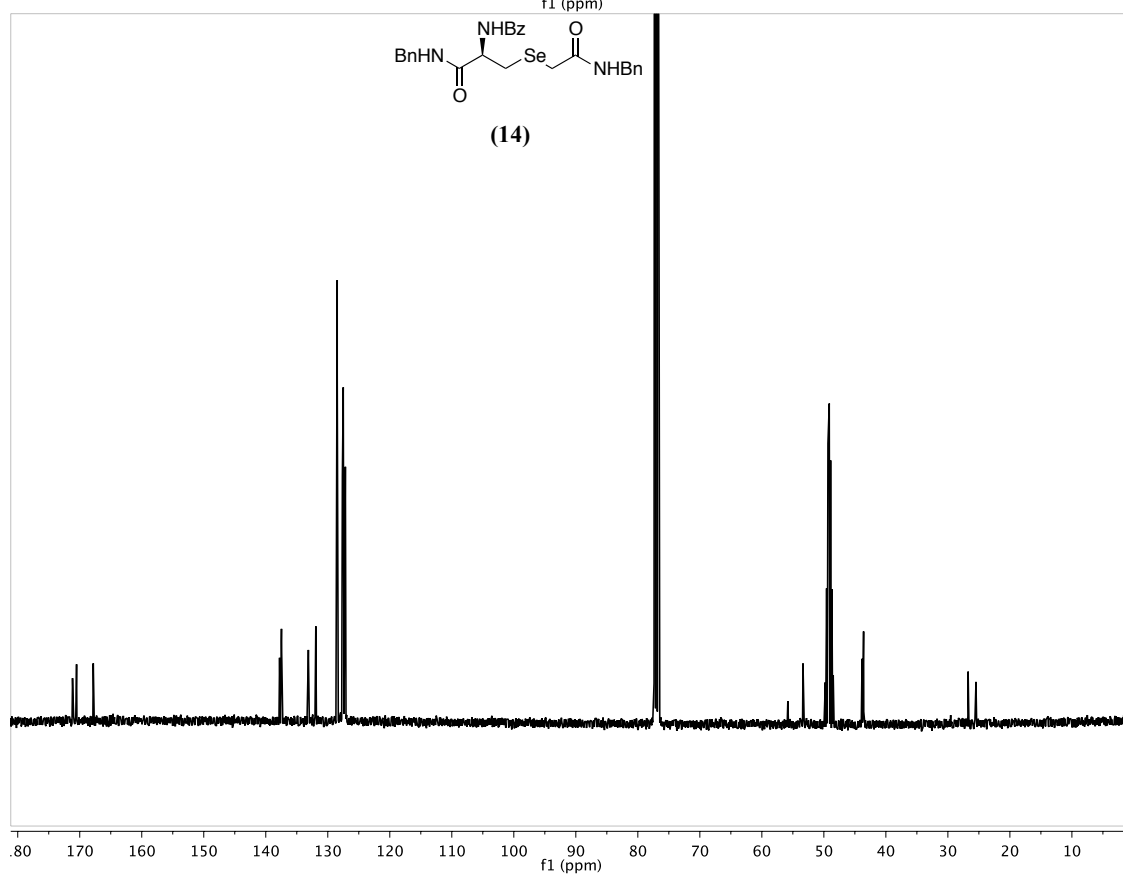

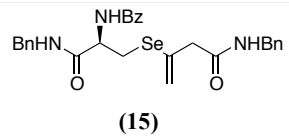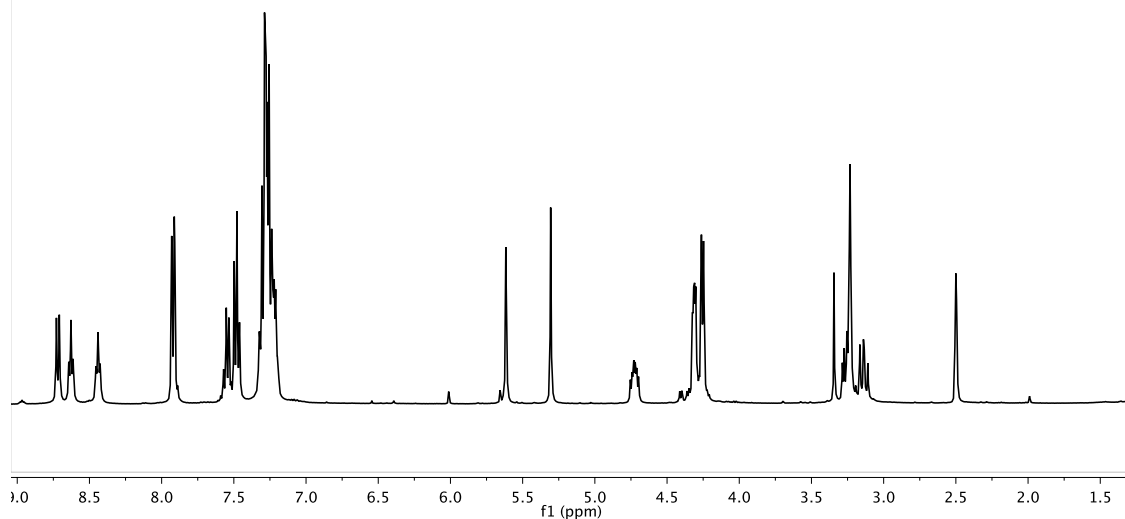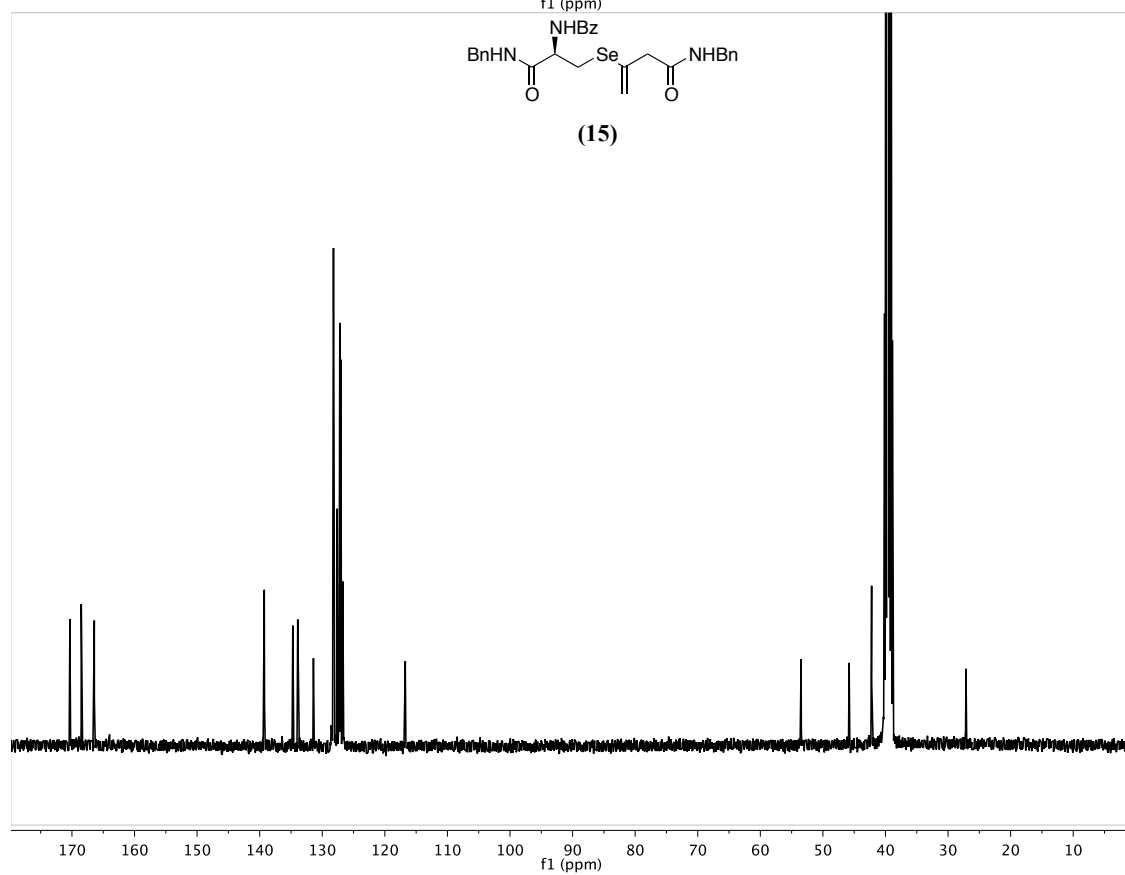

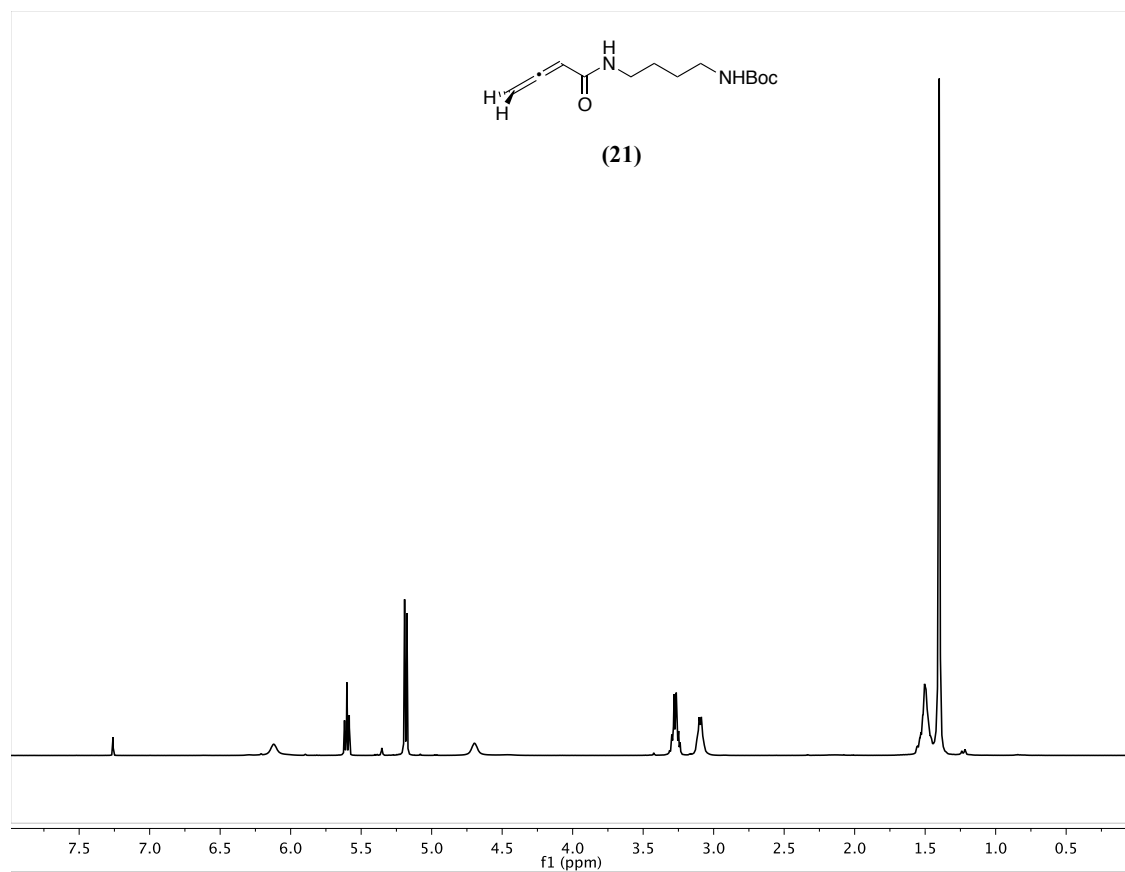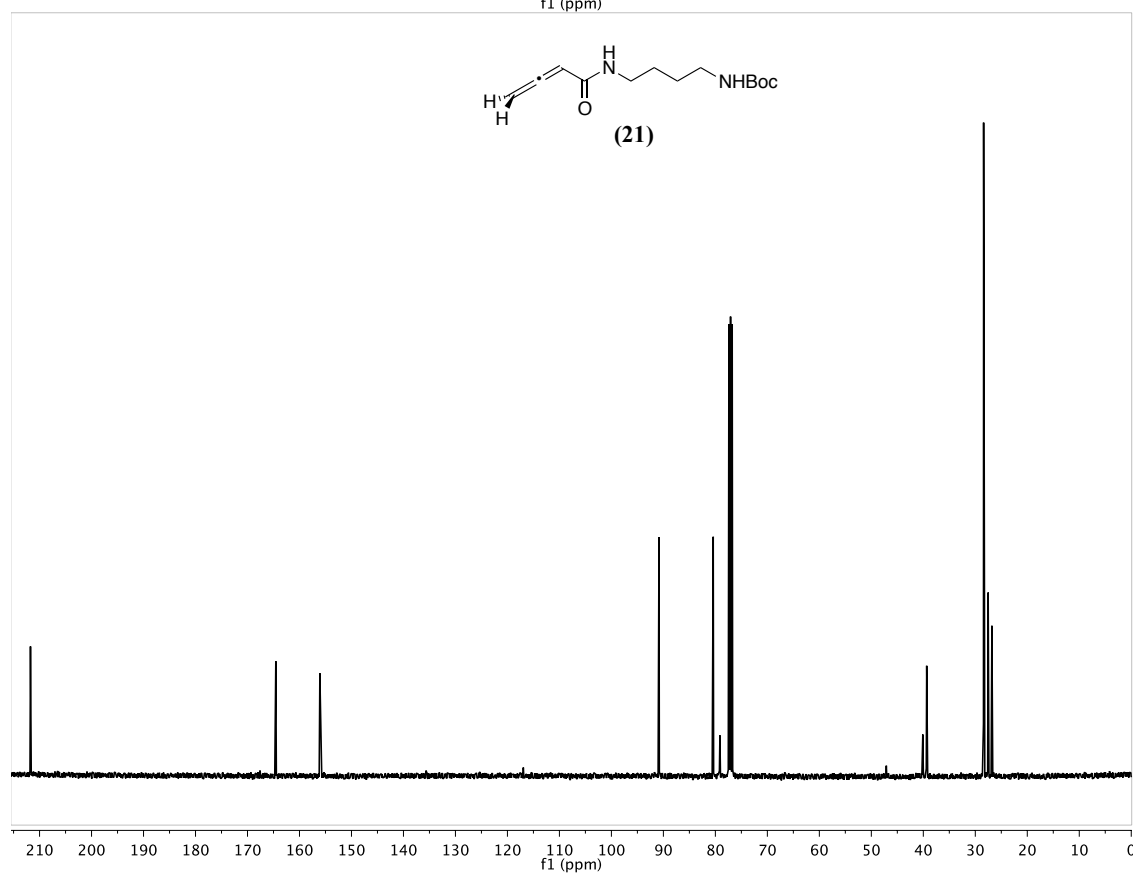

## 5. LC-MS Traces for Selenocysteine Adducts Stability Studies

### 5.1. Stability experiments at pH 5.2 NaOAc buffer

The solution of the substrate (0.0025 mmol) in THF (0.75 mL) and 100 mM pH 5.2 NaOAc buffer (0.25 mL) was stirred for 3 days at room temperature. Remaining amounts of substrate were analyzed by HPLC at 0 and 72 h.

#### 0 h [THF/100 mM NaOAc (pH 5.2)] Sec-ODA (**11**)

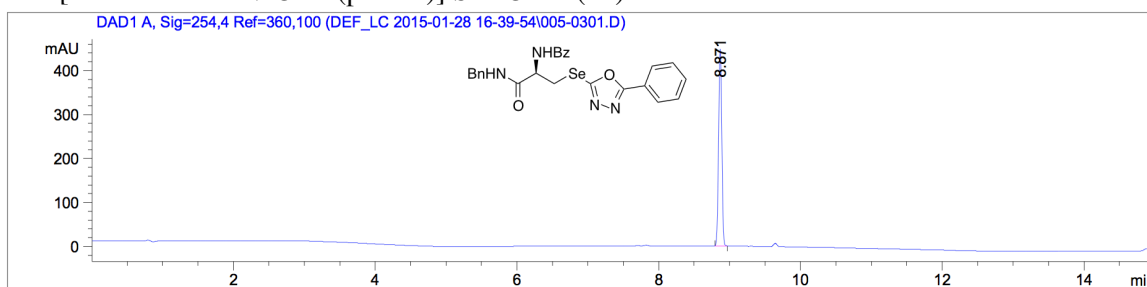

#### 72 h [THF/100 mM NaOAc (pH 5.2)]

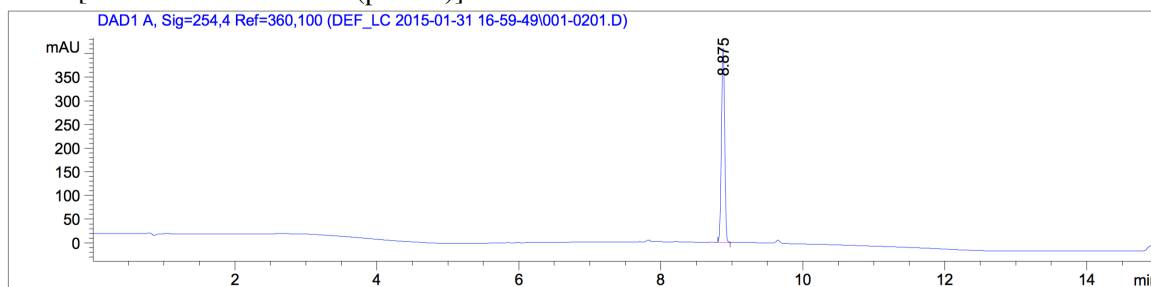

| Peak # | RetTime [min] | Type | Width [min] | Area [mAU*s] | Height [mAU] | Area %   |
|--------|---------------|------|-------------|--------------|--------------|----------|
| 1      | 8.875         | BB   | 0.0513      | 1316.81531   | 411.38223    | 100.0000 |

#### 0 h [THF/100 mM NaOAc (pH 5.2)] Sec-BTA (**12**)

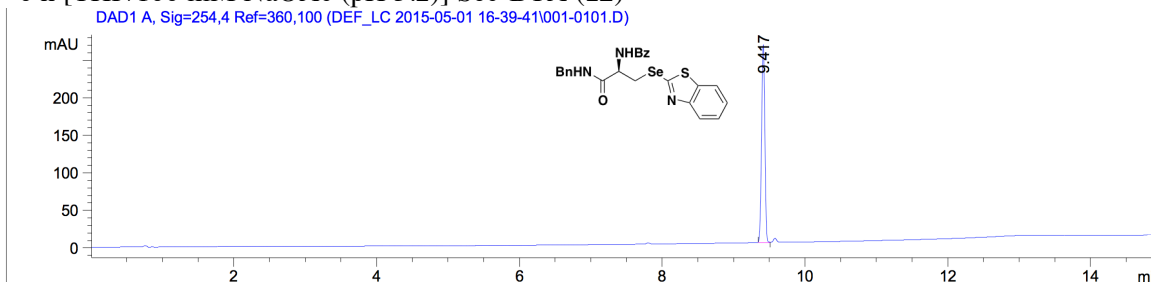

72 h [THF/100 mM NaOAc (pH 5.2)]

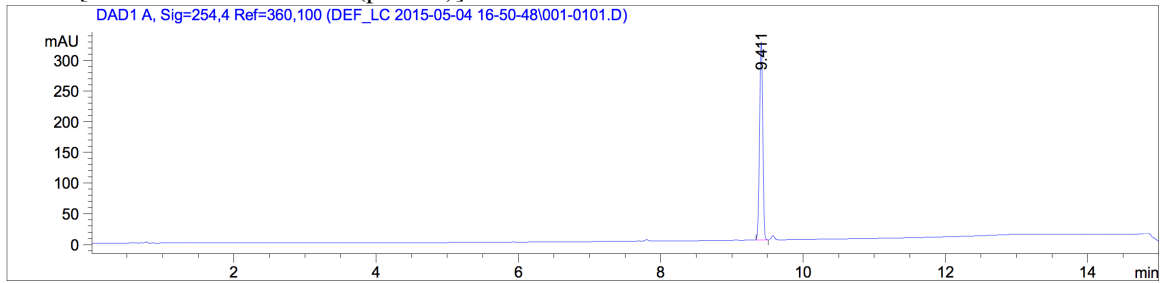

Signal 1: DAD1 A, Sig=254,4 Ref=360,100

| Peak # | RetTime [min] | Type | Width [min] | Area [mAU*s] | Height [mAU] | Area %   |
|--------|---------------|------|-------------|--------------|--------------|----------|
| 1      | 9.411         | BB   | 0.0511      | 1026.44470   | 322.95502    | 100.0000 |

0 h [THF/100 mM NaOAc (pH 5.2)] Sec-MAL (13)

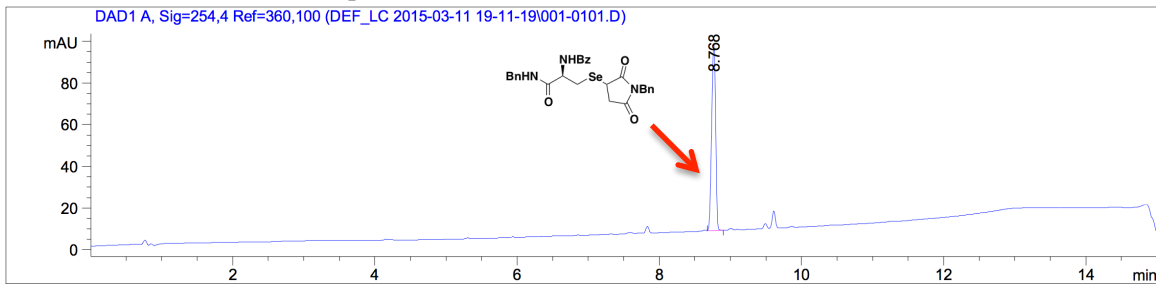

72 h [THF/100 mM NaOAc (pH 5.2)]

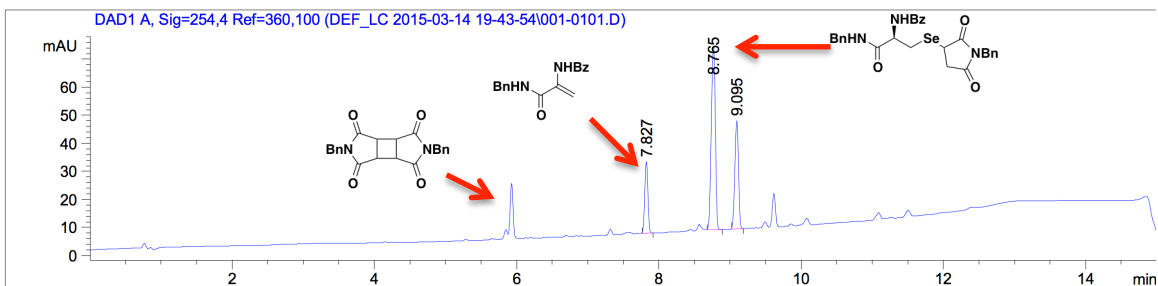

Signal 1: DAD1 A, Sig=254,4 Ref=360,100

| Peak # | RetTime [min] | Type | Width [min] | Area [mAU*s] | Height [mAU] | Area %  |
|--------|---------------|------|-------------|--------------|--------------|---------|
| 1      | 7.827         | BB   | 0.0480      | 79.02779     | 25.60394     | 16.5923 |
| 2      | 8.765         | BB   | 0.0643      | 259.63531    | 65.40703     | 54.5118 |
| 3      | 9.095         | BB   | 0.0555      | 137.62874    | 38.66005     | 28.8959 |

0 h [THF/100 mM NaOAc (pH 5.2)] Sec-IAM (14)

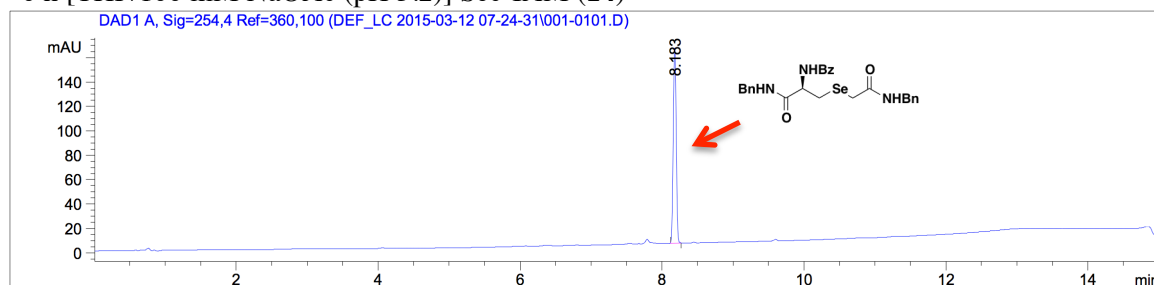

72 h [THF/100 mM NaOAc (pH 5.2)]

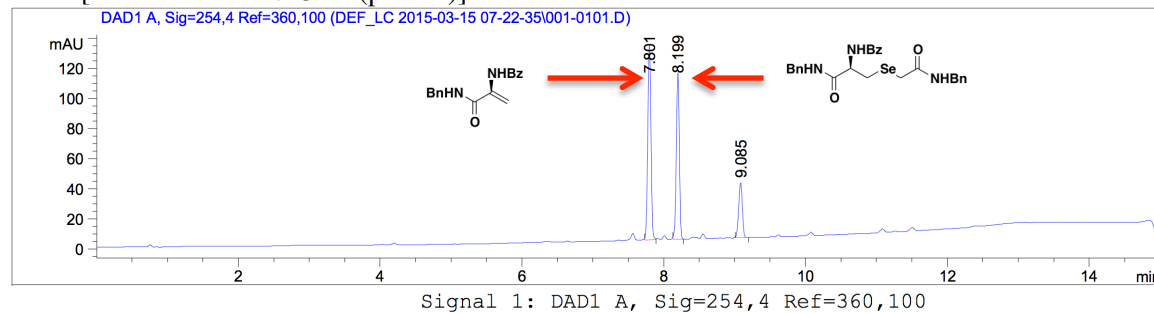

| Peak # | RetTime [min] | Type | Width [min] | Area [mAU*s] | Height [mAU] | Area %  |
|--------|---------------|------|-------------|--------------|--------------|---------|
| 1      | 7.801         | BB   | 0.0509      | 409.35870    | 129.48523    | 46.8871 |
| 2      | 8.199         | BB   | 0.0470      | 331.40213    | 110.49889    | 37.9581 |
| 3      | 9.085         | BB   | 0.0581      | 132.31171    | 36.67674     | 15.1547 |

0 h [THF/100 mM NaOAc (pH 5.2)] Sec-ALL (15)

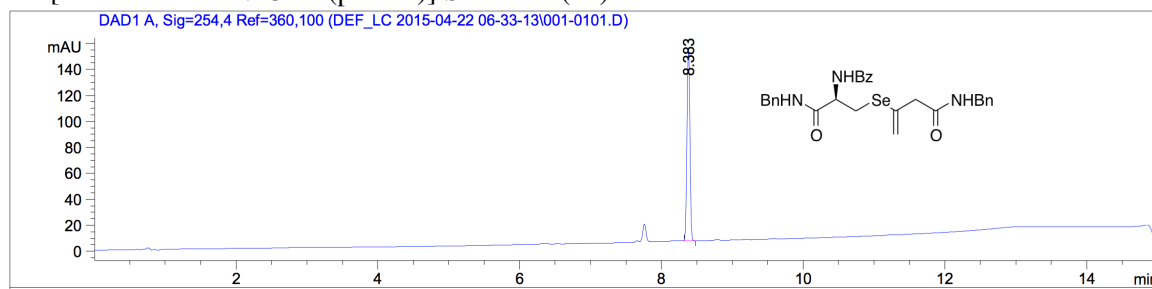

72 h [THF/100 mM NaOAc (pH 5.2)]

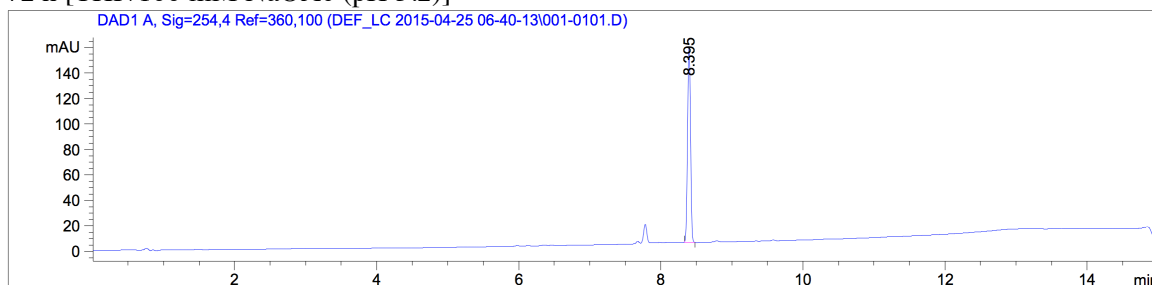



Signal 1: DAD1 A, Sig=254,4 Ref=360,100

| Peak #   | RetTime [min] | Type | Width [min] | Area [mAU*s] | Height [mAU] | Area %   |
|----------|---------------|------|-------------|--------------|--------------|----------|
| 1        | 8.395         | BB   | 0.0462      | 453.97052    | 154.90054    | 100.0000 |
| Totals : |               |      |             | 453.97052    | 154.90054    |          |

## 5.2. Stability experiments under basic conditions

The solution of the substrate (0.0025 mmol) in THF (0.75 mL),  $K_2CO_3$  (0.01 mmol) and water (0.25 mL) was stirred for 3 days at room temperature. Remaining amounts of substrate were analyzed by HPLC at 0 and 72 h.

0 h [THF/ $K_2CO_3$ ] Sec-ODA (**11**)

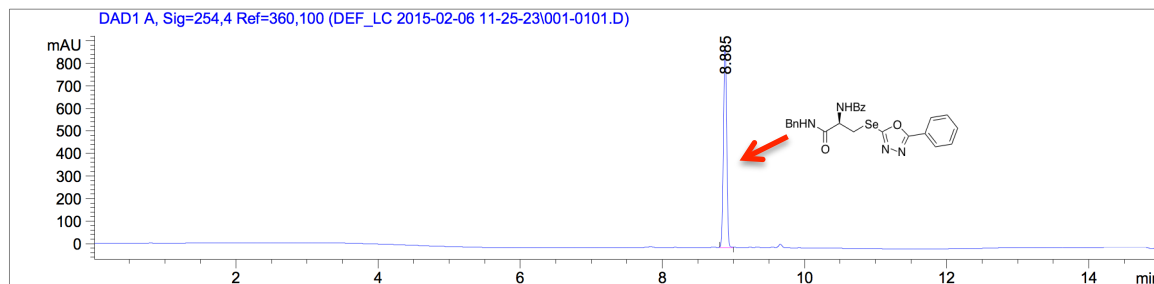

72 h [THF/ $K_2CO_3$ ]

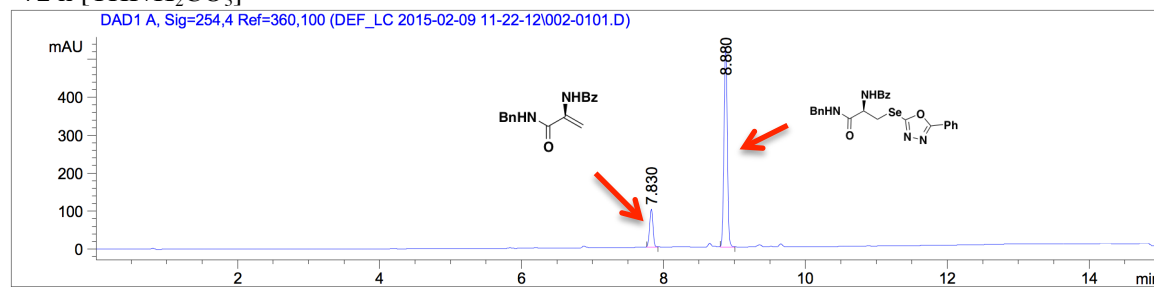

| Peak # | RetTime [min] | Type | Width [min] | Area [mAU*s] | Height [mAU] | Area %  |
|--------|---------------|------|-------------|--------------|--------------|---------|
| 1      | 7.830         | BB   | 0.0531      | 336.20941    | 100.44408    | 16.1632 |
| 2      | 8.880         | BB   | 0.0504      | 1743.88831   | 530.40320    | 83.8368 |

0 h [THF/K<sub>2</sub>CO<sub>3</sub>] Sec-BTA (12)

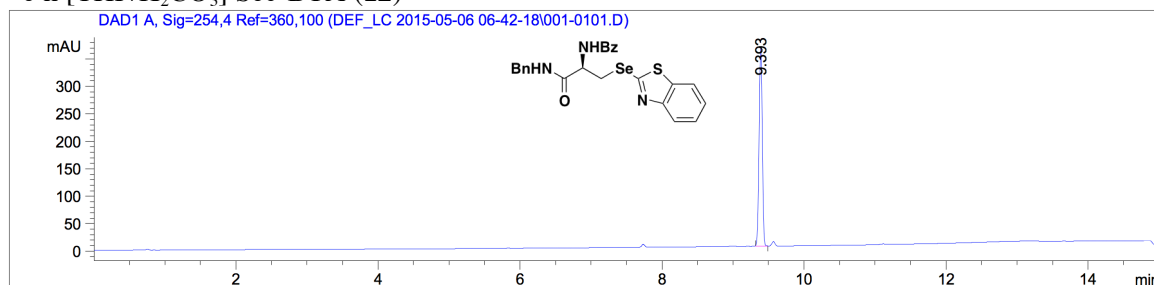

72 h [THF/K<sub>2</sub>CO<sub>3</sub>]

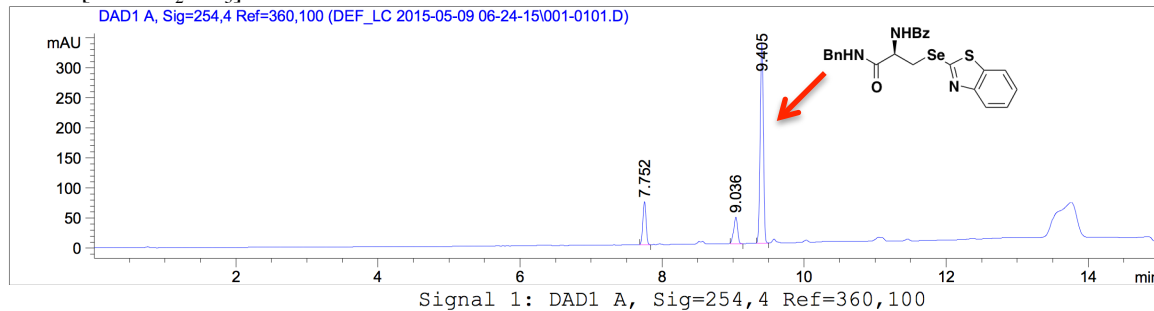

| Peak # | RetTime [min] | Type | Width [min] | Area [mAU*s] | Height [mAU] | Area %  |
|--------|---------------|------|-------------|--------------|--------------|---------|
| 1      | 7.752         | BB   | 0.0489      | 226.18492    | 71.56116     | 15.6437 |
| 2      | 9.036         | BB   | 0.0572      | 163.73650    | 44.21599     | 11.3245 |
| 3      | 9.405         | BB   | 0.0510      | 1055.93469   | 332.84763    | 73.0318 |

Just before adding K<sub>2</sub>CO<sub>3</sub> Sec-MAL (13)

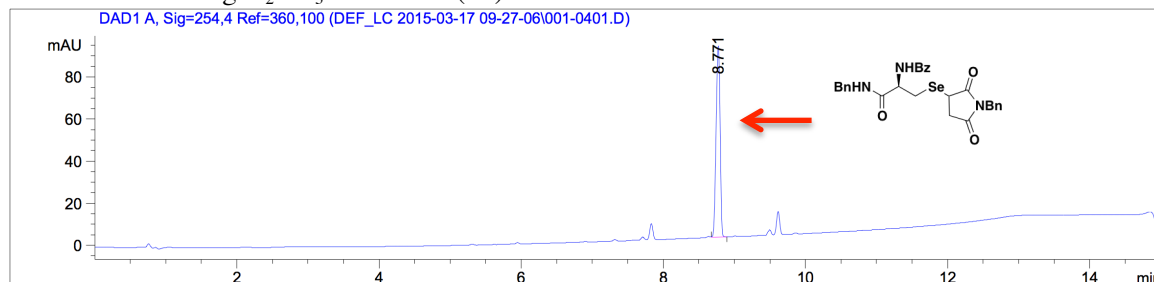

0 h [THF/K<sub>2</sub>CO<sub>3</sub>]

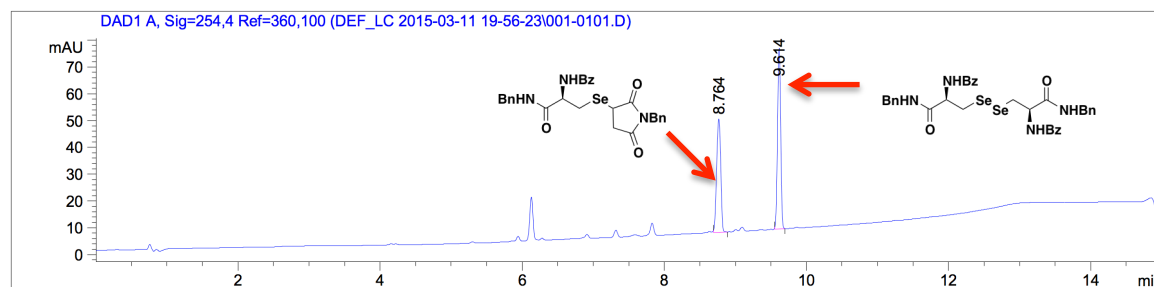

72 h [THF/K<sub>2</sub>CO<sub>3</sub>]

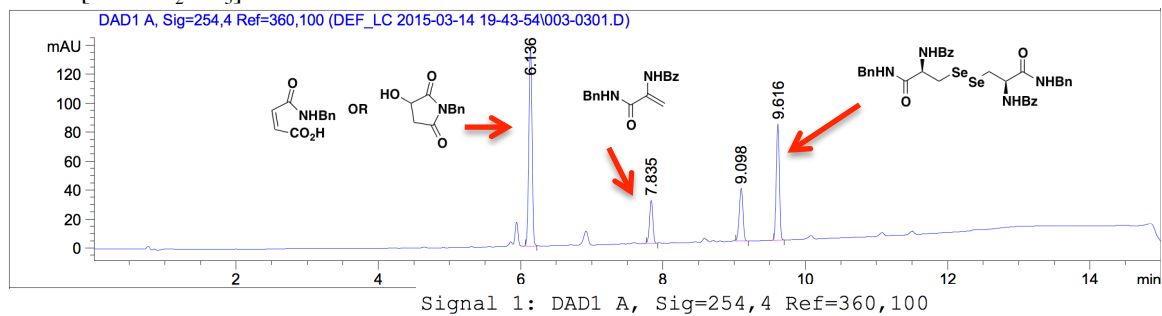

| Peak # | RetTime [min] | Type | Width [min] | Area [mAU*s] | Height [mAU] | Area %  |
|--------|---------------|------|-------------|--------------|--------------|---------|
| 1      | 6.136         | BB   | 0.0490      | 438.51343    | 138.19540    | 47.7976 |
| 2      | 7.835         | BB   | 0.0496      | 96.40651     | 29.90200     | 10.5082 |
| 3      | 9.098         | BB   | 0.0565      | 133.43469    | 36.60106     | 14.5443 |
| 4      | 9.616         | BB   | 0.0481      | 249.08412    | 80.43068     | 27.1499 |

0 h [THF/K<sub>2</sub>CO<sub>3</sub>] Sec-IAM (14)

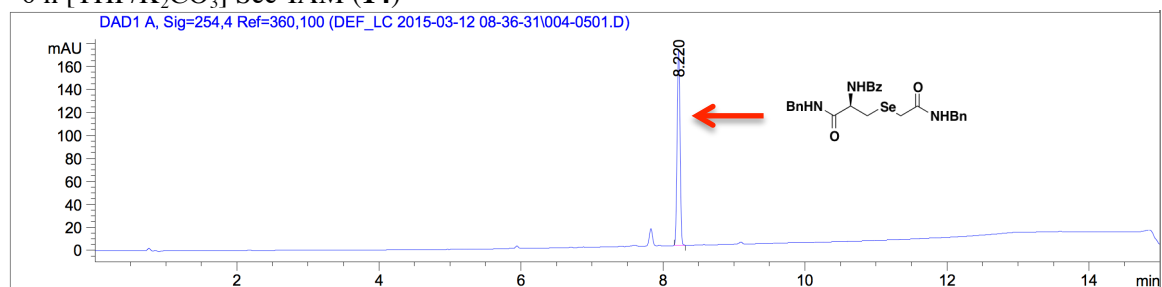

72 h [THF/K<sub>2</sub>CO<sub>3</sub>]

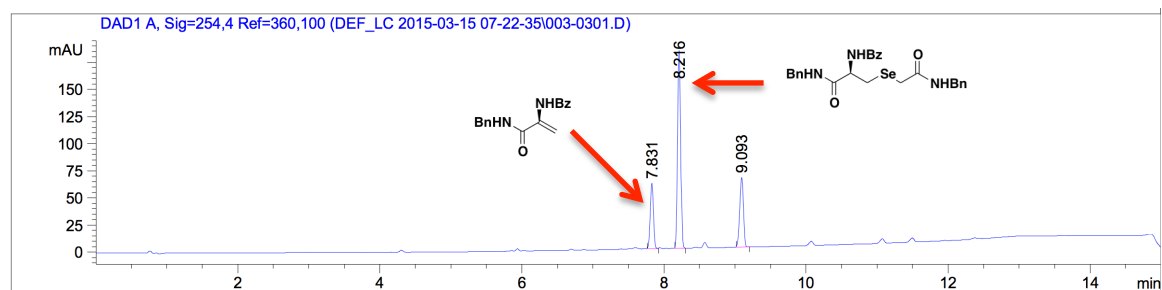

Signal 1: DAD1 A, Sig=254,4 Ref=360,100

| Peak # | RetTime [min] | Type | Width [min] | Area [mAU*s] | Height [mAU] | Area %  |
|--------|---------------|------|-------------|--------------|--------------|---------|
| 1      | 7.831         | BB   | 0.0506      | 188.73688    | 60.13903     | 19.8100 |
| 2      | 8.216         | BB   | 0.0459      | 529.01312    | 182.25276    | 55.5256 |
| 3      | 9.093         | BB   | 0.0584      | 234.98654    | 64.58604     | 24.6644 |

### 15 min [THF/K<sub>2</sub>CO<sub>3</sub>] Sec-ALL (15)

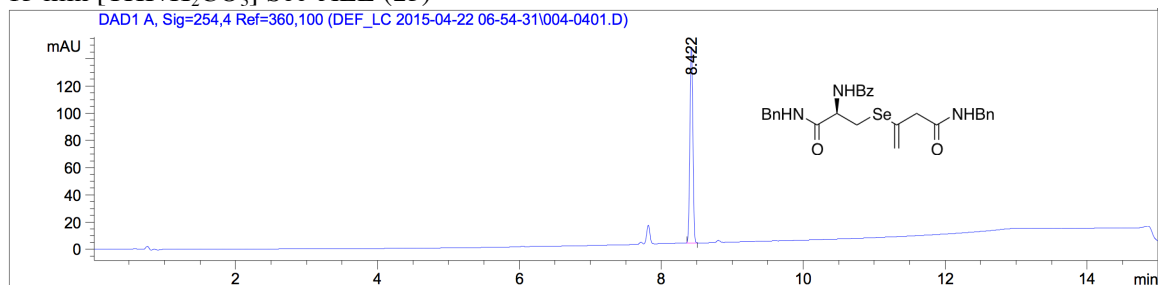

### 72 h [THF/K<sub>2</sub>CO<sub>3</sub>]

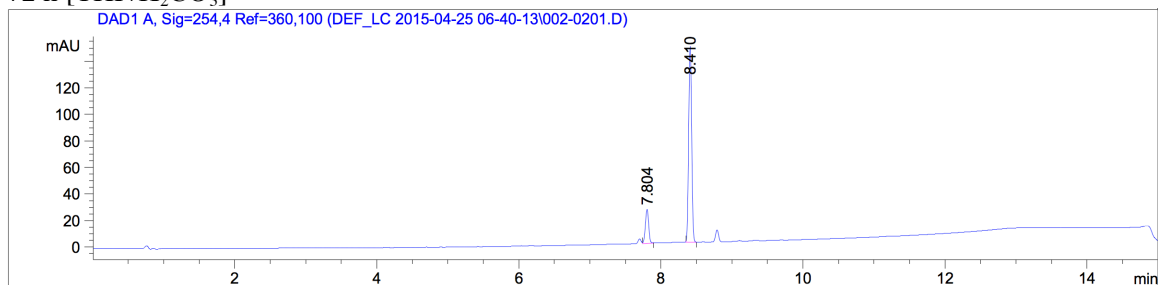

| Peak # | RetTime [min] | Type | Width [min] | Area [mAU*s] | Height [mAU] | Area %  |
|--------|---------------|------|-------------|--------------|--------------|---------|
| 1      | 7.804         | VB   | 0.0513      | 81.92669     | 25.65652     | 15.6854 |
| 2      | 8.410         | BB   | 0.0467      | 440.38470    | 148.10350    | 84.3146 |

### 5.3. Stability experiments under oxidizing conditions

The solution of the substrate (0.0025 mmol) in THF (0.75 mL), H<sub>2</sub>O<sub>2</sub> (5 mM) and pH 7 buffer (0.25 mL) was stirred for 3 days at room temperature. Remaining amounts of substrate were analyzed by HPLC at 0 and 72 h

### 0 h [THF/H<sub>2</sub>O<sub>2</sub>] Sec-ODA (11)

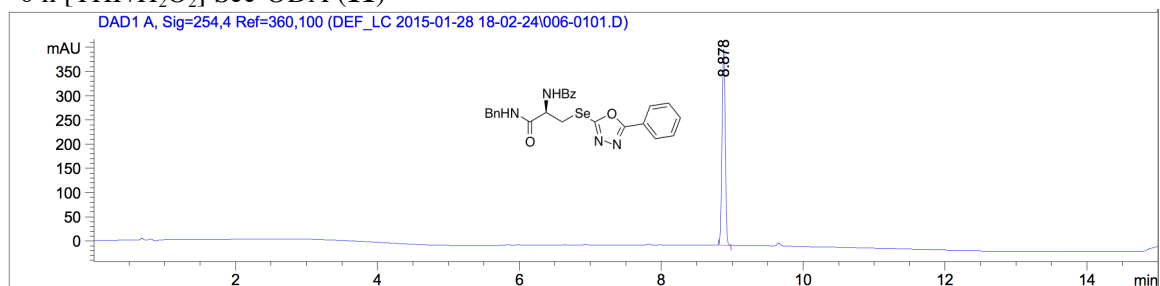

72 h [THF/H<sub>2</sub>O<sub>2</sub>]

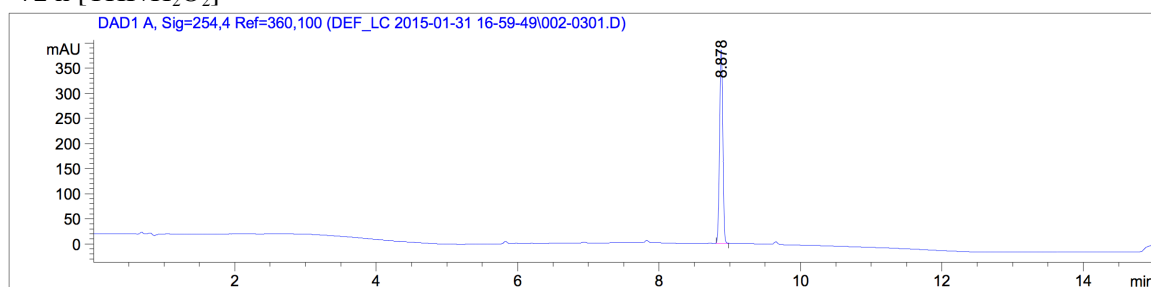

| Peak # | RetTime [min] | Type | Width [min] | Area [mAU*s] | Height [mAU] | Area %   |
|--------|---------------|------|-------------|--------------|--------------|----------|
| 1      | 8.878         | BB   | 0.0495      | 1249.99243   | 389.19852    | 100.0000 |

0 h [THF/H<sub>2</sub>O<sub>2</sub>] Sec-BTA (12)

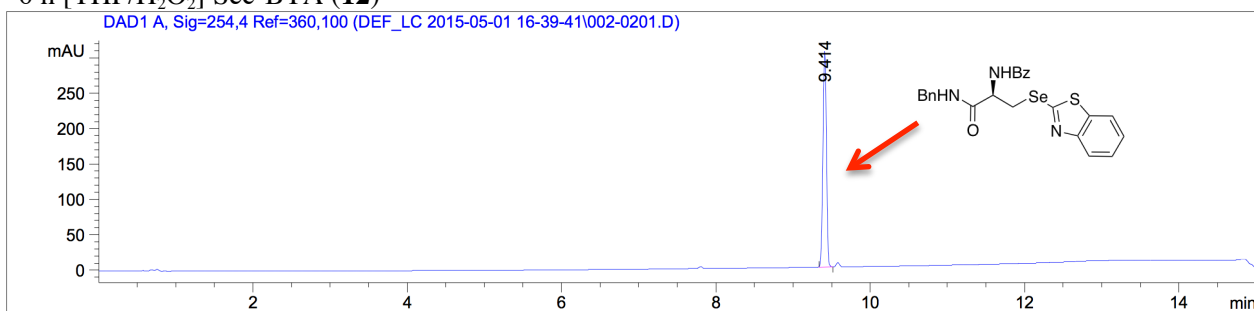

72 h [THF/H<sub>2</sub>O<sub>2</sub>]

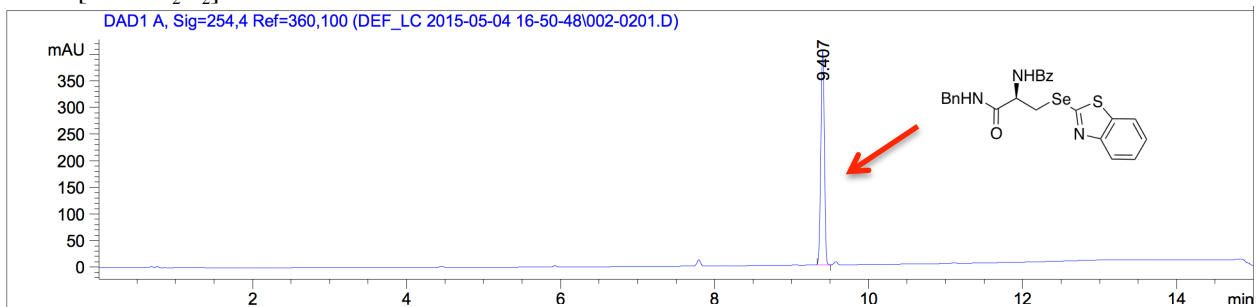

Signal 1: DAD1 A, Sig=254,4 Ref=360,100

| Peak # | RetTime [min] | Type | Width [min] | Area [mAU*s] | Height [mAU] | Area %   |
|--------|---------------|------|-------------|--------------|--------------|----------|
| 1      | 9.407         | BB   | 0.0492      | 1296.25757   | 407.00394    | 100.0000 |

### 0 h [THF/H<sub>2</sub>O<sub>2</sub>] Sec-MAL (13)

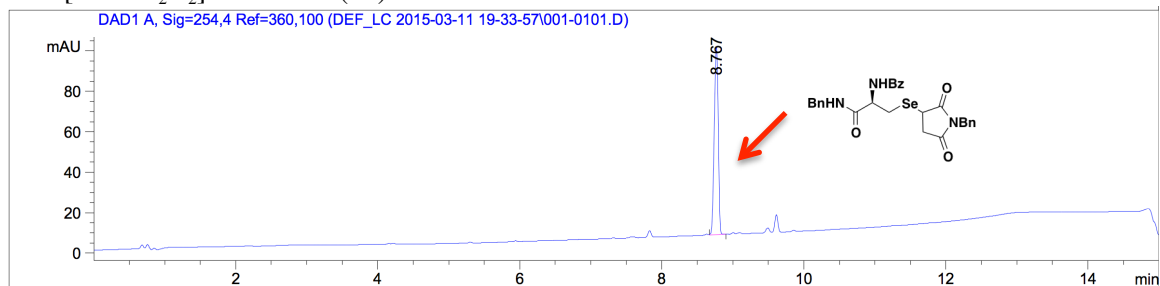

### 72 h [THF/H<sub>2</sub>O<sub>2</sub>]

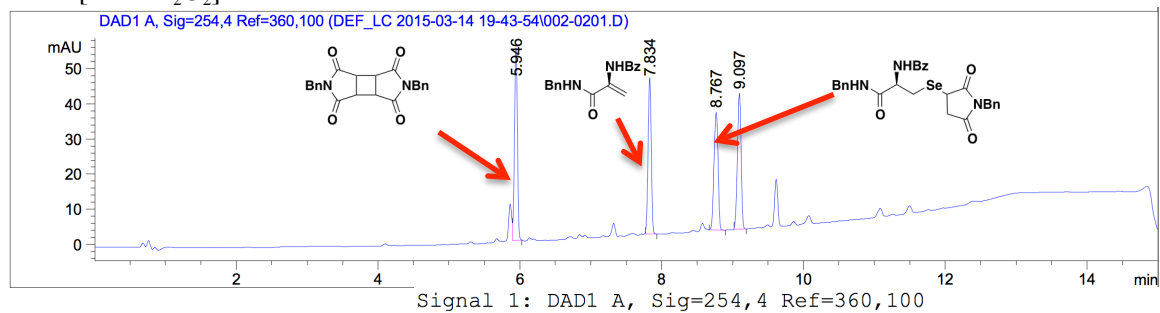

| Peak # | RetTime [min] | Type | Width [min] | Area [mAU*s] | Height [mAU] | Area %  |
|--------|---------------|------|-------------|--------------|--------------|---------|
| 1      | 5.946         | VB   | 0.0458      | 160.32913    | 55.33151     | 27.9014 |
| 2      | 7.834         | BB   | 0.0506      | 139.63368    | 44.50903     | 24.2999 |
| 3      | 8.767         | BB   | 0.0668      | 134.37415    | 33.50397     | 23.3846 |
| 4      | 9.097         | BB   | 0.0563      | 140.29071    | 38.68728     | 24.4142 |

### 0 h [THF/H<sub>2</sub>O<sub>2</sub>] Sec-IAM (14)

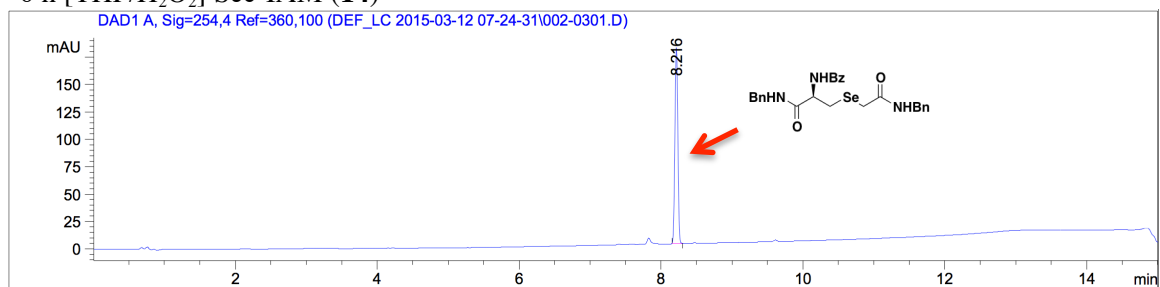

### 72 h [THF/H<sub>2</sub>O<sub>2</sub>]

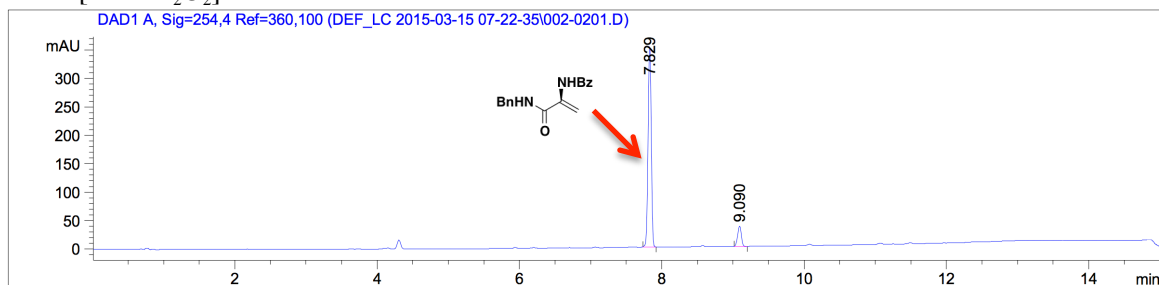

Signal 1: DAD1 A, Sig=254,4 Ref=360,100

| Peak # | RetTime [min] | Type | Width [min] | Area [mAU*s] | Height [mAU] | Area %  |
|--------|---------------|------|-------------|--------------|--------------|---------|
| 1      | 7.829         | BB   | 0.0489      | 1119.75000   | 354.50128    | 89.6153 |
| 2      | 9.090         | BB   | 0.0583      | 129.75697    | 35.75947     | 10.3847 |

#### 15 min [THF/H<sub>2</sub>O<sub>2</sub>] Sec-ALL (15)

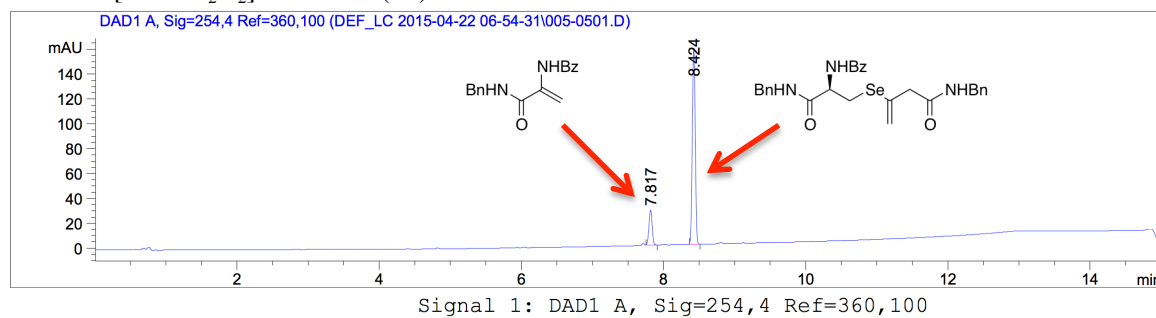

| Peak # | RetTime [min] | Type | Width [min] | Area [mAU*s] | Height [mAU] | Area %  |
|--------|---------------|------|-------------|--------------|--------------|---------|
| 1      | 7.763         | MM   | 0.0523      | 43.41139     | 13.83810     | 9.0446  |
| 2      | 8.383         | BB   | 0.0482      | 436.55859    | 148.74916    | 90.9554 |

#### 72 h [THF/H<sub>2</sub>O<sub>2</sub>]

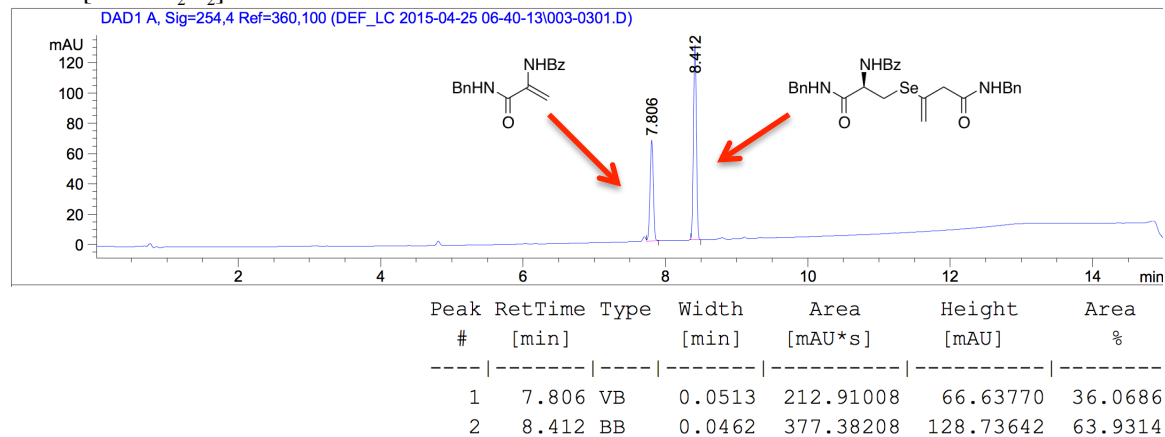

#### 5.4. Stability study in the presence of glutathione

The solution of the substrate (2.5  $\mu$ mol) in THF (0.75 mL) was added glutathione (GSH, 20 nmol, 20  $\mu$ M final concentration) in PBS buffer pH 7.4 (0.25 mL) and the mixture was stirred at 37 °C for 3 days.

Remaining amounts of substrate were analyzed by HPLC at 0 and 72 h.

0 h [20  $\mu$ M Glutathione (GSH)/THF/PBS] Sec-ODA (11)

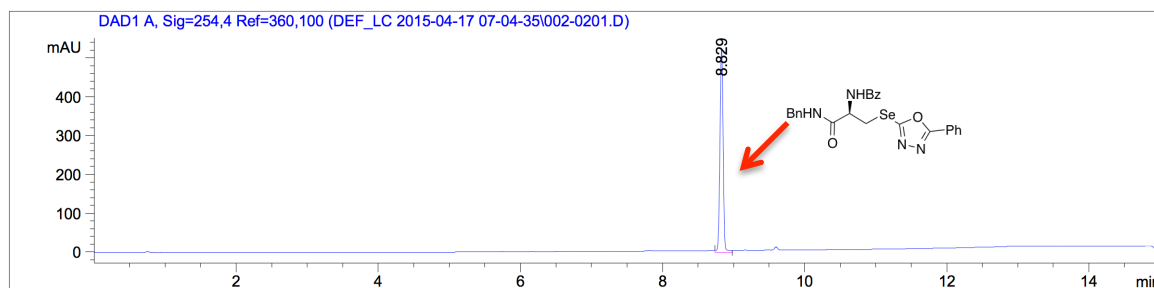

72 h [20  $\mu$ M Glutathione (GSH)/THF/PBS]

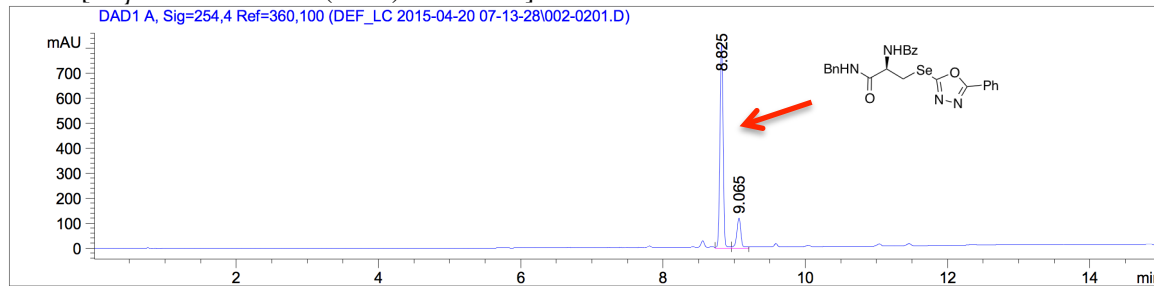

Signal 1: DAD1 A, Sig=254,4 Ref=360,100

| Peak # | RetTime [min] | Type | Width [min] | Area [mAU*s] | Height [mAU] | Area %  |
|--------|---------------|------|-------------|--------------|--------------|---------|
| 1      | 8.825         | VV   | 0.0506      | 2580.00488   | 822.29919    | 83.3087 |
| 2      | 9.065         | VV   | 0.0633      | 516.91522    | 122.26472    | 16.6913 |

0 h [20  $\mu$ M Glutathione (GSH)/THF/PBS] Sec-BTA (12)

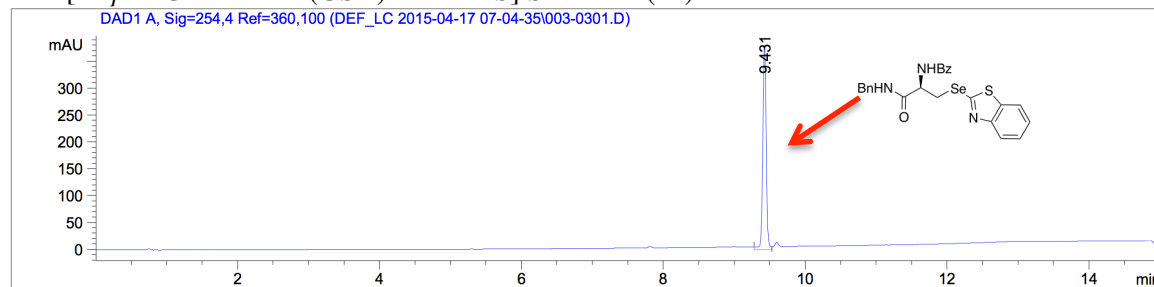

72 h [20  $\mu$ M Glutathione (GSH)/THF/PBS]

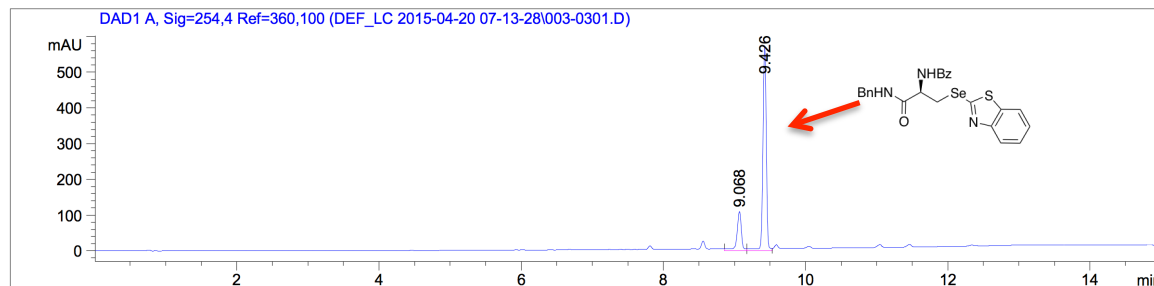



Signal 1: DAD1 A, Sig=254,4 Ref=360,100

| Peak # | RetTime [min] | Type | Width [min] | Area [mAU*s] | Height [mAU] | Area %  |
|--------|---------------|------|-------------|--------------|--------------|---------|
| 1      | 9.068         | VV   | 0.0680      | 490.57880    | 110.04535    | 20.2209 |
| 2      | 9.426         | VV   | 0.0533      | 1935.52014   | 574.12799    | 79.7791 |

0 h [20  $\mu$ M Glutathione (GSH)/THF/PBS] Sec-MAL (13)

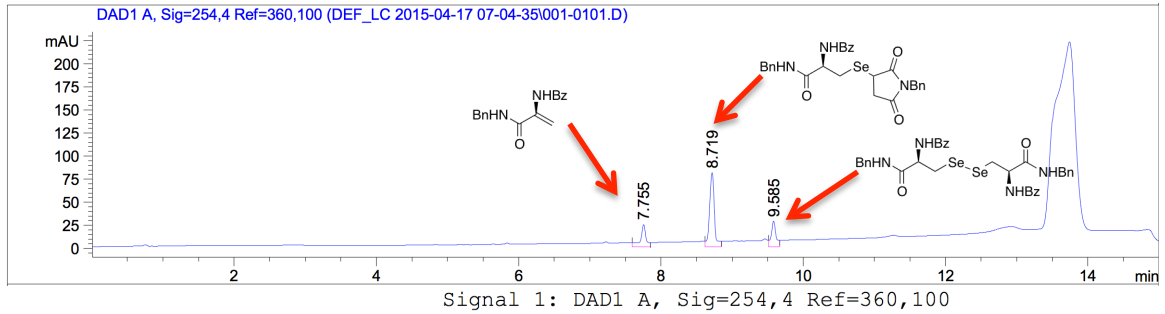

| Peak # | RetTime [min] | Type | Width [min] | Area [mAU*s] | Height [mAU] | Area %  |
|--------|---------------|------|-------------|--------------|--------------|---------|
| 1      | 7.755         | VV   | 0.0756      | 131.47903    | 24.11124     | 20.3689 |
| 2      | 8.719         | VV   | 0.0755      | 383.08081    | 80.59831     | 59.3474 |
| 3      | 9.585         | VV   | 0.0687      | 130.92946    | 27.90836     | 20.2838 |

72 h [20  $\mu$ M Glutathione (GSH)/THF/PBS]

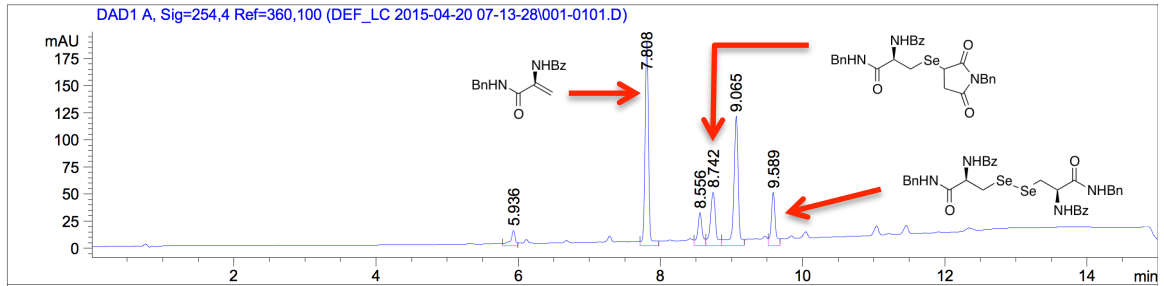

Signal 1: DAD1 A, Sig=254,4 Ref=360,100

| Peak # | RetTime [min] | Type | Width [min] | Area [mAU*s] | Height [mAU] | Area %  |
|--------|---------------|------|-------------|--------------|--------------|---------|
| 1      | 5.936         | VV   | 0.0684      | 68.47449     | 14.16934     | 3.7185  |
| 2      | 7.808         | VV   | 0.0523      | 655.33435    | 189.61926    | 35.5874 |
| 3      | 8.556         | VV   | 0.0661      | 136.61131    | 30.58173     | 7.4186  |
| 4      | 8.742         | VV   | 0.0806      | 256.21854    | 49.35325     | 13.9137 |
| 5      | 9.065         | VV   | 0.0655      | 527.39581    | 119.42727    | 28.6398 |
| 6      | 9.589         | VV   | 0.0588      | 197.44440    | 49.27272     | 10.7221 |

0 h [20  $\mu$ M Glutathione (GSH)/THF/PBS] Sec-IAM (14)

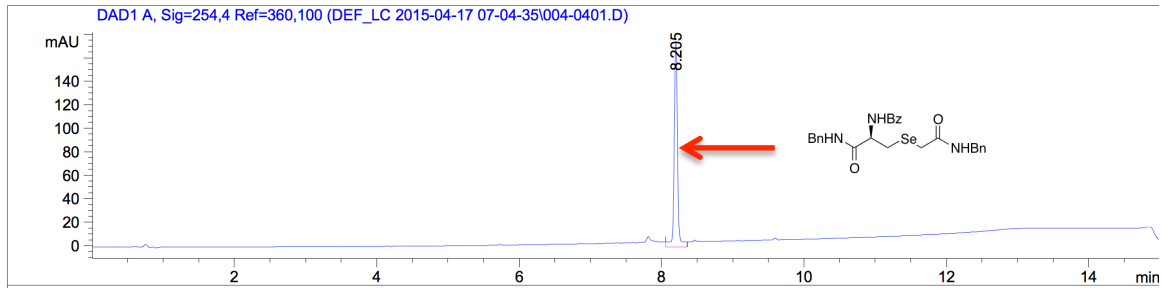

72 h [20  $\mu$ M Glutathione (GSH)/THF/PBS]

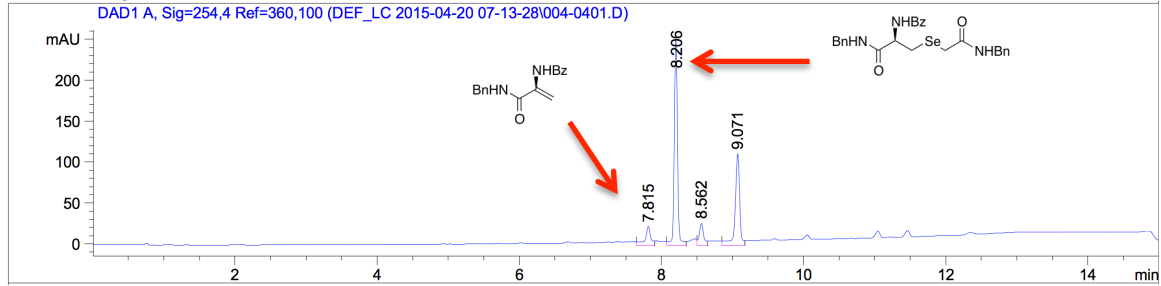

Signal 1: DAD1 A, Sig=254,4 Ref=360,100

| Peak # | RetTime [min] | Type | Width [min] | Area [mAU*s] | Height [mAU] | Area %  |
|--------|---------------|------|-------------|--------------|--------------|---------|
| 1      | 7.815         | VV   | 0.0765      | 126.16600    | 22.81664     | 8.2566  |
| 2      | 8.206         | VV   | 0.0509      | 791.66071    | 250.46336    | 51.8082 |
| 3      | 8.562         | VV   | 0.0643      | 114.67382    | 26.59954     | 7.5045  |
| 4      | 9.071         | VV   | 0.0678      | 495.55920    | 111.65112    | 32.4306 |

0 h [20  $\mu$ M Glutathione (GSH)/THF/PBS] Sec-ALL (15)

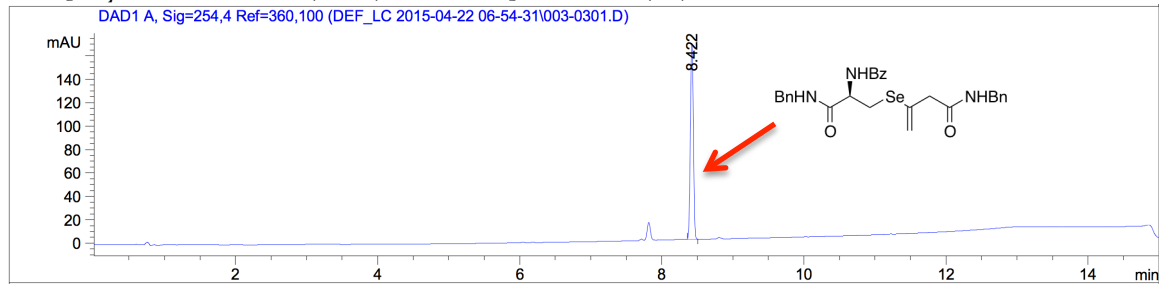

Signal 1: DAD1 A, Sig=254,4 Ref=360,100

| Peak # | RetTime [min] | Type | Width [min] | Area [mAU*s] | Height [mAU] | Area %  |
|--------|---------------|------|-------------|--------------|--------------|---------|
| 1      | 7.817         | MM   | 0.0542      | 51.20485     | 15.74344     | 9.3682  |
| 2      | 8.422         | BB   | 0.0461      | 495.37906    | 169.32568    | 90.6318 |

## 72 h [20 $\mu$ M Glutathione (GSH)/THF/PBS]

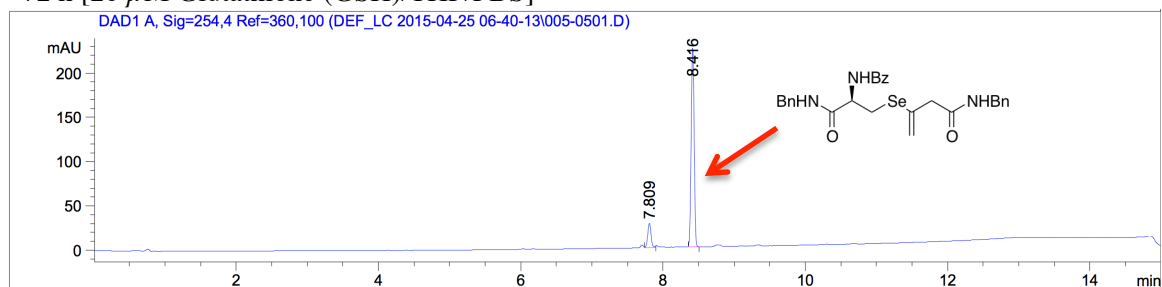

| Peak # | RetTime [min] | Type | Width [min] | Area [mAU*s] | Height [mAU] | Area %  |
|--------|---------------|------|-------------|--------------|--------------|---------|
| 1      | 7.809         | VB   | 0.0502      | 89.59914     | 27.37656     | 11.8890 |
| 2      | 8.416         | BB   | 0.0462      | 664.03326    | 226.37442    | 88.1110 |

## 5.5. Stability study in human blood plasma

A solution of substrate (50  $\mu$ L, 4 mM in DMSO) was added to human plasma (950  $\mu$ L) at 0  $^{\circ}$ C. The mixture was incubated for 72 h at 37  $^{\circ}$ C. Samples for HPLC analysis (100  $\mu$ L) were collected from the mixture at each time point. To the collected samples were added MeCN (600  $\mu$ L) containing N-benzylbenzamide (internal standard, **IS**) and centrifuged for 5 minutes at 5000 rpm. The supernatant (600  $\mu$ L) was analyzed by HPLC (254 nm).

## 0 h [plasma] Phenyloxadiazole-Selenocysteine Adduct (Sec-ODA **11**)

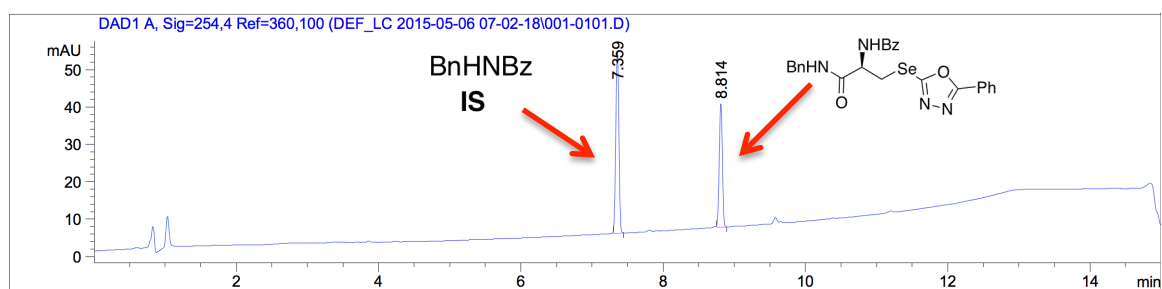

24 h [plasma]

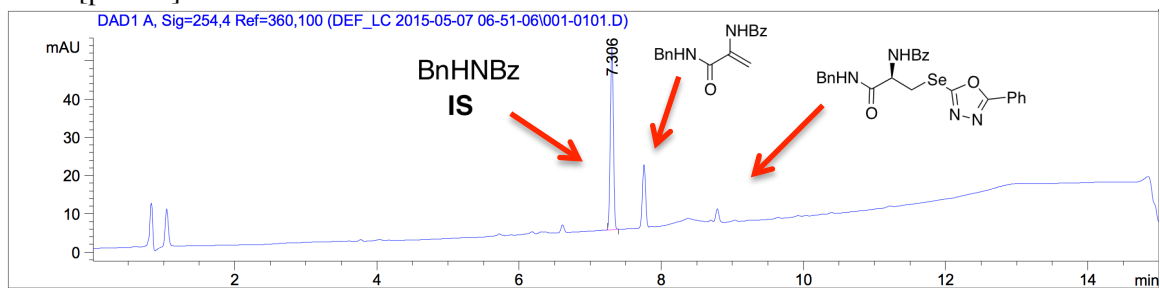

48 h [plasma]

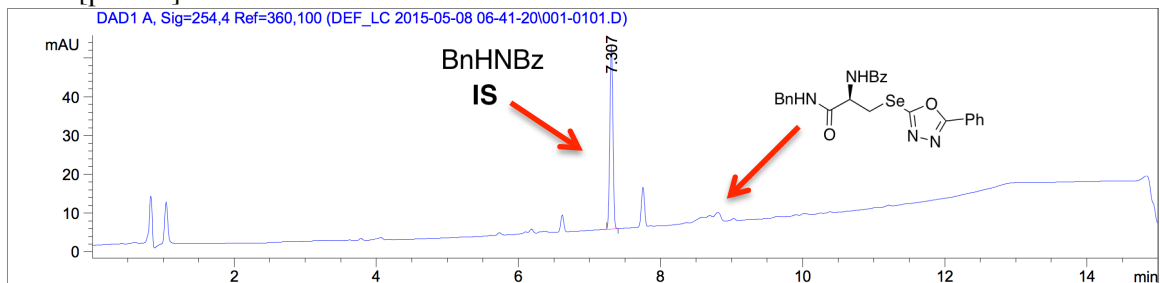

72 h [plasma]

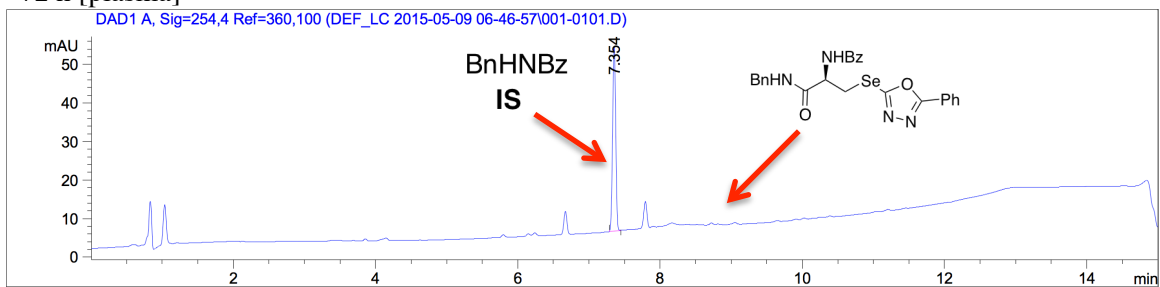

| Time/h | IS area   | Sec-ODA ( <b>11</b> ) area | % Remaining |
|--------|-----------|----------------------------|-------------|
| 0      | 150.21799 | 101.38508                  | 100         |
| 24     | 145.25957 | 10.37195                   | 10.6        |
| 48     | 144.67004 | 8.44145                    | 8.65        |
| 72     | 146.65027 | 0                          | 0.00        |

0 h [plasma] Benzothiazole-Selenocysteine Adduct (Sec-BTA (**12**))

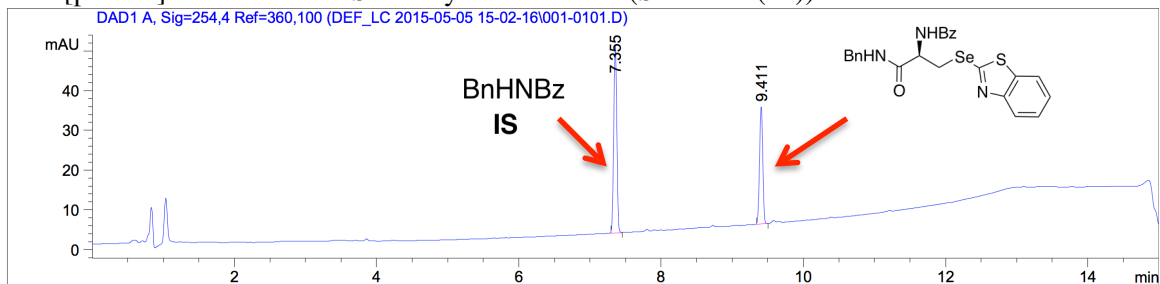

24 h [plasma]

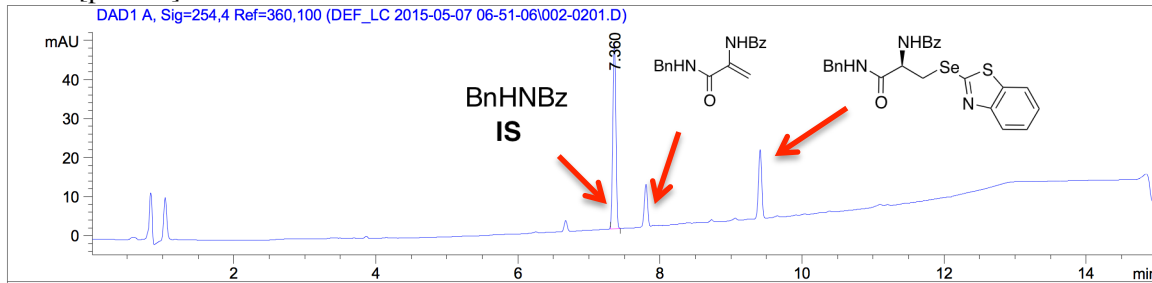

48 h [plasma]

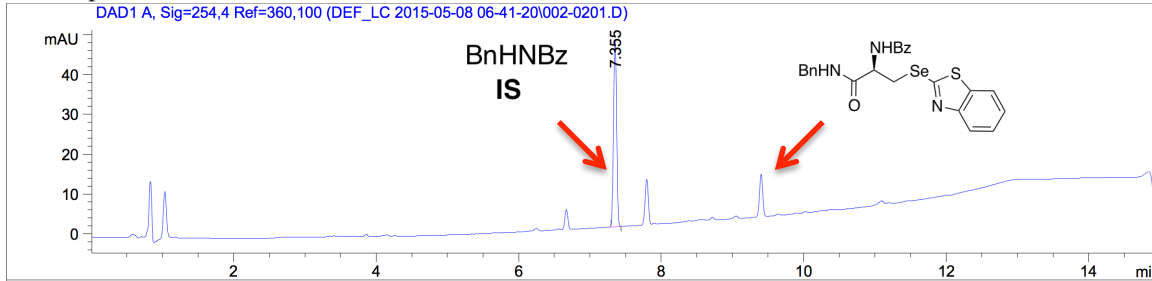

72 h [plasma]

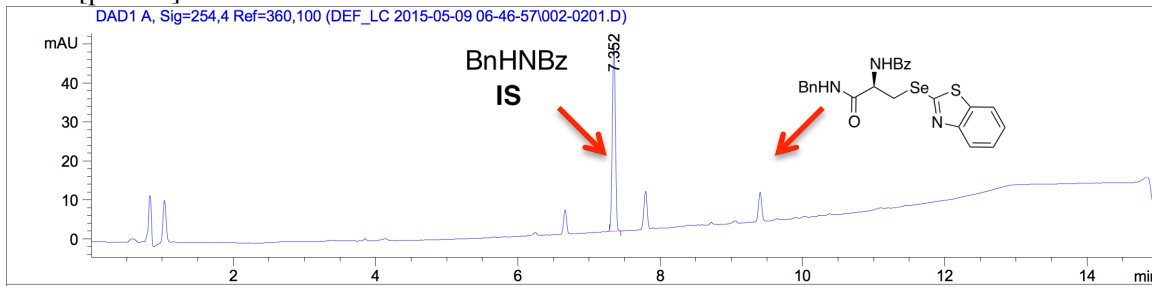

| Time/h | IS area   | Sec-BTA ( <b>12</b> ) area | % Remaining |
|--------|-----------|----------------------------|-------------|
| 0      | 144.55676 | 93.96006                   | 100         |
| 24     | 146.74489 | 56.03693                   | 58.7        |
| 48     | 145.50803 | 34.67171                   | 36.7        |
| 72     | 147.53522 | 24.39896                   | 25.4        |

0 h [plasma] Iodoacetamide-Selenocysteine Adduct (Sec-IAM (**14**))

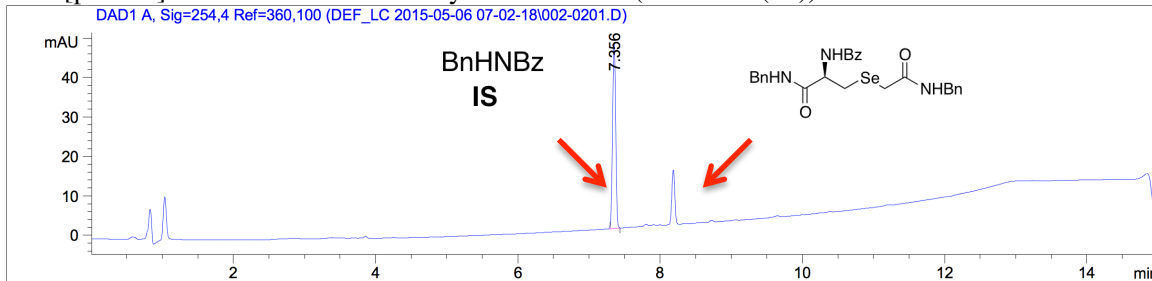

24 h [plasma]

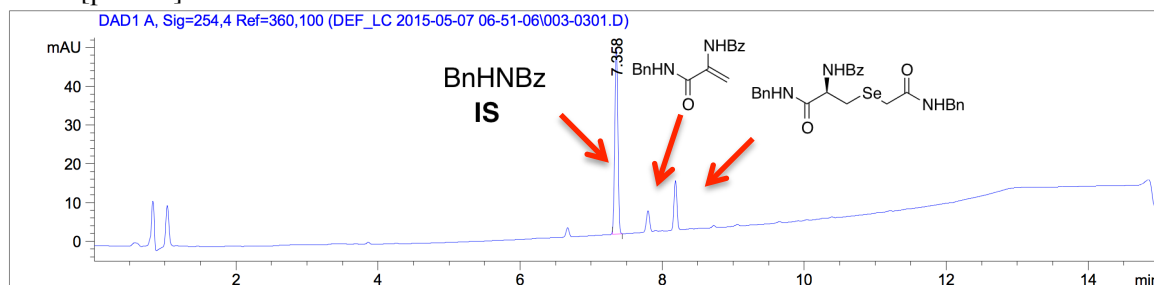

48 h [plasma]

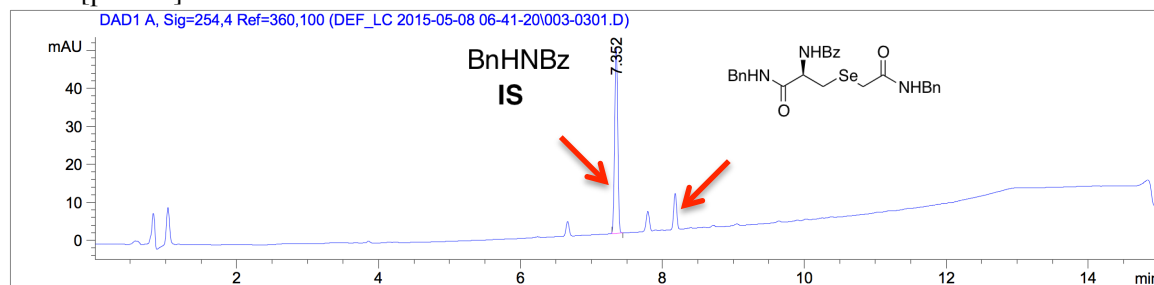

72 h [plasma]

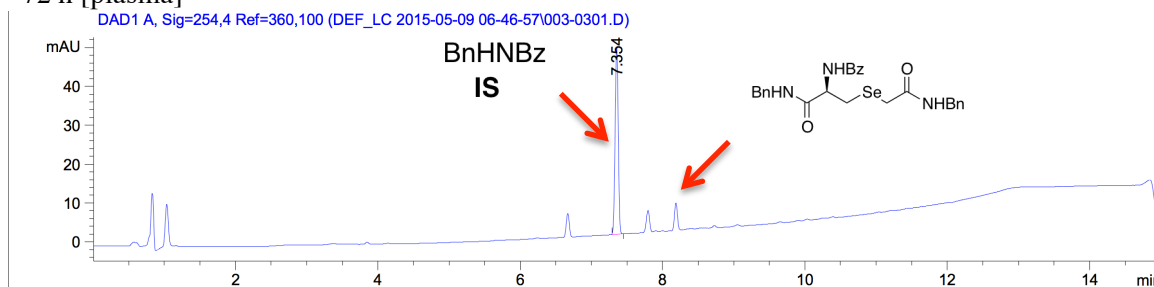

| Time/h | IS area   | Sec-IAM (14) area | % Remaining |
|--------|-----------|-------------------|-------------|
| 0      | 145.50101 | 40.32212          | 100         |
| 24     | 148.23933 | 37.86126          | 92.2        |
| 48     | 150.33929 | 28.08746          | 67.4        |
| 72     | 147.77037 | 20.66275          | 50.5        |

0 h [plasma] Allene-Selenocysteine Adduct (Sec-ALL (15))

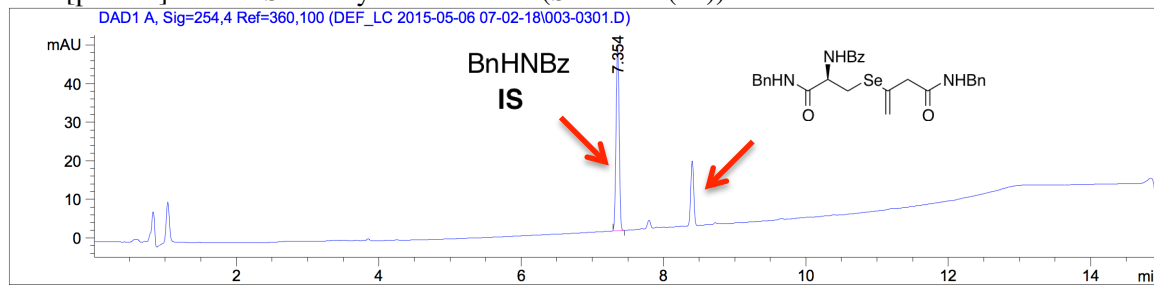

24 h [plasma]

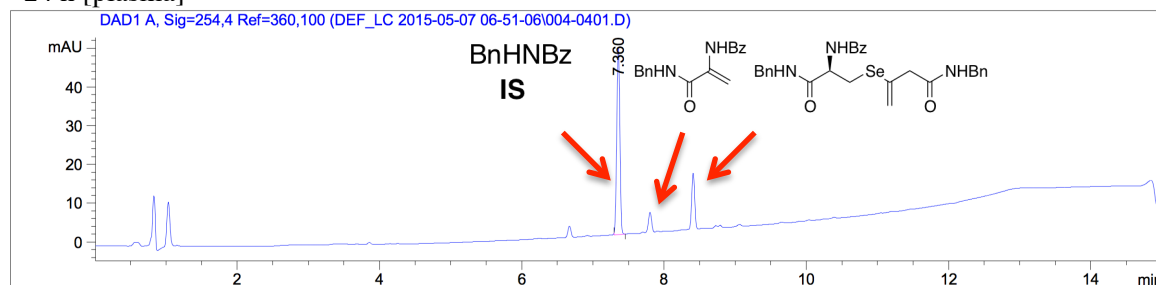

48 h [plasma]

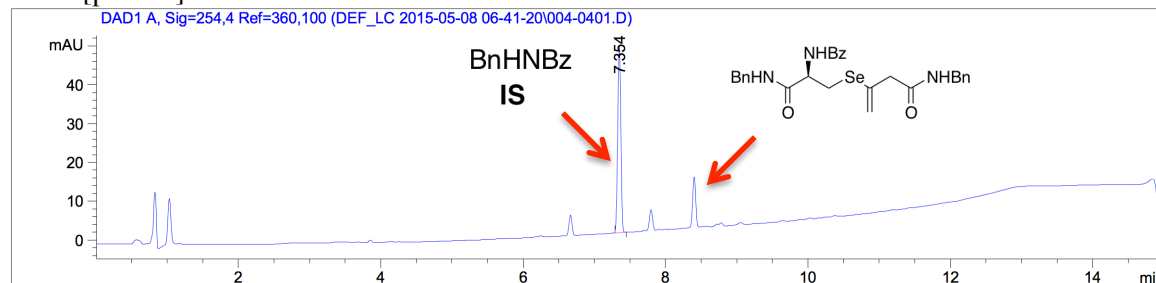

72 h [plasma]

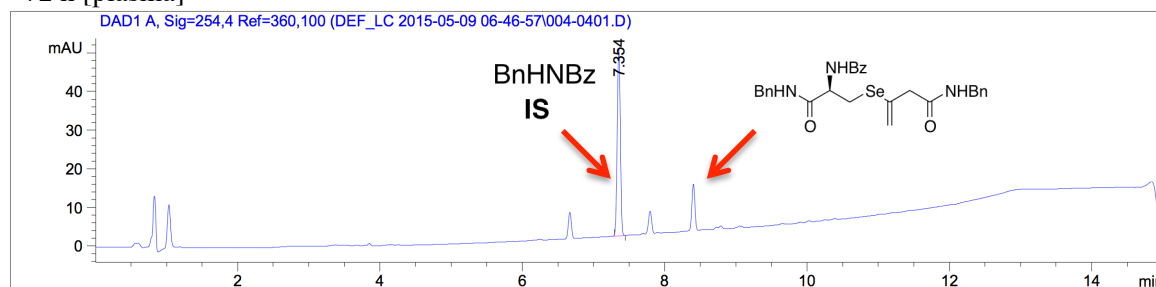

| Time/h | IS area   | Sec-ALL ( <b>15</b> ) area | % Remaining |
|--------|-----------|----------------------------|-------------|
| 0      | 147.14783 | 49.82321                   | 100         |
| 24     | 148.26094 | 43.2604                    | 86.2        |
| 48     | 148.00545 | 39.35146                   | 78.5        |
| 72     | 148.81026 | 36.97701                   | 73.4        |

## 6. References

1. N. Toda, S. Asano and C. F. Barbas, *Angew. Chem. Int. Ed.*, 2013, **52**, 12592-12596.
2. A. A. H. Elmehriki, M. Milne, M. Suchy, R. Bartha and R. H. E. Hudson, *Can J Chem*, 2013, **91**, 211-219.
3. A. Abbas, B. G. Xing and T. P. Loh, *Angew. Chem. Int. Ed.*, 2014, **53**, 7491-7494.
4. X. L. Li, J. T. Patterson, M. Sarkar, L. Pedzisa, T. Kodadek, W. R. Roush and C. Rader, *Bioconjugate Chem.*, 2015, **26**, 2243-2248.
5. J. T. Patterson, S. Asano, X. L. Li, C. Rader and C. F. Barbas, *Bioconjugate Chem.*, 2014, **25**, 1402-1407.
